# Supplementary material for: Setting benchmarks for ethylene and propylene oxidation via electrochemical routes: a process design and technoeconomic analysis approach
Source: Royal Society of Chemistry journal article supplement (doi:10.1039/d4gc02672a), 2024-01-01
Supplement: d4gc02672a1.pdf [file d4gc02672a1.pdf]

# Supporting Information: Setting Benchmarks for Ethylene and Propylene Oxidation via Electrochemical Routes: A Process Design and Technoeconomic Analysis Approach

*AUTHOR NAMES: Adam P. Sibal<sup>1</sup>, Richa Ghosh<sup>2</sup>, David W. Flaherty<sup>2</sup>, Ashlynn S. Stillwell<sup>1\*</sup>*

*AUTHOR ADDRESS: <sup>1</sup>Civil and Environmental Engineering, University of Illinois Urbana-Champaign, 205 N Mathews Ave, MC-250, Urbana IL 61801*

*<sup>2</sup>School of Chemical and Biomolecular Engineering, Georgia Institute of Technology, Atlanta, GA 30332*

## Table of Contents

|                                                                                                                                                    |           |
|----------------------------------------------------------------------------------------------------------------------------------------------------|-----------|
| S1. Introductory and Background Information .....                                                                                                  | 3         |
| <b>S1.1 Detailed Descriptions of Reaction Mechanisms for the Reactions Modeled .....</b>                                                           | <b>3</b>  |
| <b>S1.2 Ethylene and Propylene Electrooxidation Reactions .....</b>                                                                                | <b>7</b>  |
| <b>S1.3 U.S. Ethylene, EO, and EG Production .....</b>                                                                                             | <b>8</b>  |
| <b>S1.4 U.S. Propylene, PO, and PG Production .....</b>                                                                                            | <b>12</b> |
| <b>S1.5 Calculations for Single-Pass Conversion and Stoichiometric Reaction from Reported Literature Values for Ethylene Systems Example .....</b> | <b>14</b> |
| <b>S1.6 Detailed Single Pass Conversion and Carbon Selectivity by System.....</b>                                                                  | <b>15</b> |
| S2. Saturated Aqueous Electrochemical Process Models .....                                                                                         | 16        |
| <b>S2.1 Saturated Aqueous Electrochemical Ethylene Process Model.....</b>                                                                          | <b>16</b> |
| <b>S2.2 Saturated Aqueous Electrochemical Propylene Process Model .....</b>                                                                        | <b>18</b> |
| S3. Gaseous Electrochemical Ethylene Epoxidation Process Models and Additional Results Summaries 20                                                |           |
| <b>S3.1 System E1 Electrochemical Ethylene Epoxidation Process Model.....</b>                                                                      | <b>20</b> |
| <b>S3.2 System E2 Electrochemical Ethylene Epoxidation Process Model.....</b>                                                                      | <b>24</b> |
| <b>S3.3 System E3 Electrochemical Ethylene Epoxidation Process Model.....</b>                                                                      | <b>28</b> |
| <b>S3.4 System E4 Electrochemical Ethylene Epoxidation Process Model.....</b>                                                                      | <b>31</b> |
| <b>S3.5 Theoretical Electrochemical Ethylene Epoxidation Process Model.....</b>                                                                    | <b>35</b> |
| <b>S3.6 Theoretical Electrochemical Ethylene Epoxidation Process Model.....</b>                                                                    | <b>41</b> |
| <b>S3.7 System E3 Sensitivity to Applied Voltage and Electricity Price .....</b>                                                                   | <b>42</b> |
| S4. Gaseous Electrochemical Propylene Epoxidation Process Models and Additional Results Summaries .....                                            | 44        |
| <b>S4.1 System P1, P2, and P3 Electrochemical Propylene Epoxidation Process Model .....</b>                                                        | <b>44</b> |
| <b>S4.2 System P4 Electrochemical Propylene Epoxidation Process Model.....</b>                                                                     | <b>48</b> |
| <b>S4.3 Theoretical Electrochemical Propylene Epoxidation Process Model.....</b>                                                                   | <b>52</b> |
| <b>S4.4 System P2 Sensitivity to Applied Voltage and Electricity Price .....</b>                                                                   | <b>58</b> |
| S5. Uncertainty Analysis Parameters.....                                                                                                           | 60        |
| <b>S5.1 Ethylene Processes Uncertainty Analysis Parameters.....</b>                                                                                | <b>60</b> |
| <b>S5.2 Propylene Processes Uncertainty Analysis Parameters .....</b>                                                                              | <b>61</b> |
| S6. References .....                                                                                                                               | 62        |

## S1. Introductory and Background Information

### S1.1 Detailed Descriptions of Reaction Mechanisms for the Reactions Modeled

Lum et al. investigated the oxidation of ethylene to EO and EG on a variety of Pd-based catalysts. They achieved an EG FE of ~60% with Pd dendritic nanostructures. They propose that the electrooxidation of ethylene to ethylene glycol proceeded through the successive transfer of two OH groups to ethylene, involving the intermediate  $*C_2H_4OH$ . Through bulk electrolysis and CV studies, they showed that increased  $*OH$  coverage promotes ethylene glycol formation and activates the catalyst. The EG FE was increased to 70% through doping the Pd dendritic nanostructures with Au. Density functional theory experiments suggest that the Au performs the transfer step of OH to  $*C_2H_4OH$  easily and allows for the facile desorption of ethylene glycol, reducing further oxidation. Low EO FE (<3%) was observed for all materials tested.<sup>1</sup>

Ke et al. investigated three facets of  $Ag_3PO_4$  ((100), (110), (111)) for electrochemical propylene oxidation and found that the (100) facet (corresponding to  $Ag_3PO_4$  cubes) had the highest activity of the three. They used DFT calculations and ATR-FTIRS to prove that the electroepoxidation of propylene (Pr) over  $Ag_3PO_4$  crystals undergoes an OH-correlated pathway rather than an O-correlated and dehydrogenation pathway. In the OH-correlated pathway,  $H_2O$  adsorbs and dissociates into  $*OH$  on Ag sites. This  $*OH$  reacts with  $Pr^*$  to produce a bidentate  $PrOH^*$  intermediate, which then transports to a  $PrO^*$  intermediate through O-H bond dissociation of  $PrOH^*$ . The  $PrO^*$  is then transformed to  $PO^*$  before desorption. The apparent activation energy barrier for the OH-correlated pathway was lower than for the O-correlated pathway. Density functional theory calculations and  $OH^-$  and propylene stripping experiments show that the (100)

facet had the lowest propylene and OH\* adsorption energies of the three Ag<sub>3</sub>PO<sub>4</sub> facets, providing evidence as to why the (100) facet has the highest activity.<sup>2</sup>

Using DFT and ATR-FTIR, Winiwarter et al. thoroughly investigate the pathways of electrochemical propylene oxidation to allyl alcohol, acrolein, and acrylic acid, but only briefly comment on the oxidation of propylene to propylene glycol. They note that on Pd, propylene glycol is only produced significantly at potentials >1.0 V<sub>RHE</sub>. They propose that at high potentials, lower coverage of propylene-derived species, evident through stripping experiments, can enable vinyl group coordination, allowing for oxidation of the double bond. They suggest product selectivity can be manipulated through surface coverage, as the coverage affects the propylene adsorbate geometry, which can lead to different reaction pathways. The formation of propylene oxide and propylene glycol can be promoted through the selective activation of the propylene vinyl group on weaker adsorption sites.<sup>3</sup>

**Table S1.** Detailed electrochemical ethylene and propylene epoxidation literature data.

| System Name | Catalyst                                                  | Epoxidation FE (%) | Glycol FE (%) | Current Density (mA cm <sup>-2</sup> ) | Electrolyte Composition                     | Potential                | Cell                     | Major Products                                                                    | Notes                                                                | Reference |
|-------------|-----------------------------------------------------------|--------------------|---------------|----------------------------------------|---------------------------------------------|--------------------------|--------------------------|-----------------------------------------------------------------------------------|----------------------------------------------------------------------|-----------|
| E1          | PdAu (Au 3.2at%)<br>Dendritic Nanostructures/Glass Carbon | 0.634              | 70            | 4.75                                   | Ethylene saturated 0.1 M NaClO <sub>4</sub> | 1.1 V <sub>Ag/AgCl</sub> | 3-compartment semi-batch | ethylene glycol, glycolaldehyde, acetaldehyde, ethylene oxide, formic acid        | *FE Current density taken from Figure S33, taken at end of 100 h run | 1         |
| E2          | PdO•H <sub>2</sub> O                                      | -                  | 42            | 3                                      | Ethylene saturated 0.1 M NaClO <sub>4</sub> | 1.1 V <sub>Ag/AgCl</sub> | 3-compartment semi-batch | ethylene glycol, glycolaldehyde, acetaldehyde, ethylene oxide                     | *FE Current density taken from Figure S21, taken at end of 2 h run   | 1         |
| E3          | Pd Nanoparticle                                           | 3                  | 12            | 1                                      | Ethylene saturated 0.1 M NaClO <sub>4</sub> | 1.1 V <sub>Ag/AgCl</sub> | 3-compartment semi-batch | ethylene glycol                                                                   | *FE Current density taken from Figure S21, taken at end of 2 h run   | 1         |
| E4          | Pd Powder                                                 | 2                  | 11            | 0.85                                   | Ethylene saturated 0.1 M NaClO <sub>4</sub> | 1.1 V <sub>Ag/AgCl</sub> | 3-compartment semi-batch | ethylene glycol, acetaldehyde, ethylene oxide                                     | *FE Current density taken from Figure S21, taken at end of 2 h run   | 1         |
| P1          | Ag <sub>3</sub> PO <sub>4</sub> (100) Cubes               | 19                 | -             | 2.05                                   | 0.1 M Phospahte Buffer Solution             | 2.2 V <sub>RHE</sub>     | 3-compartment Semi-Batch | Propylene oxide, acetone, acetic acid                                             | Current Density and FE taken from Figures 2a and b                   | 2         |
| P2          | Ag <sub>3</sub> PO <sub>4</sub> (110) Rhombic Dodecahedra | 17                 | -             | 1.88                                   | 0.1 M Phospahte Buffer Solution             | 2.2 V <sub>RHE</sub>     | 3-compartment Semi-Batch | Propylene oxide, acetone, acetic acid                                             | Current Density and FE taken from Figures 2a and b                   | 2         |
| P3          | Ag <sub>3</sub> PO <sub>4</sub> (111) Tetrahedra          | 13                 | -             | 1.23                                   | 0.1 M Phospahte Buffer Solution             | 2.2 V <sub>RHE</sub>     | 3-compartment Semi-Batch | Propylene oxide, acetone, acetic acid                                             | Current Density and FE taken from Figures 2a and b                   | 2         |
| P4          | Pd/Glassy Carbon                                          | -                  | 17            | 0.001                                  | 0.1 M HClO <sub>4</sub>                     | 1.1 V <sub>RHE</sub>     | H-cell                   | Propylene glycol, acrolein, allyl alcohol, acrylic acid, acetone, CO <sub>2</sub> | Current Density and FE taken from Figures 2a and b                   | 3         |

The three publications investigated in this work come from Lum et al., Ke et al., and Winiwarter et al. Lum et al. investigated the oxidation of ethylene to EO and EG on various Pd-based catalysts. They achieved an EG FE of ~60% with Pd dendritic nanostructures. The EG FE was increased to 70% through doping the Pd dendritic nanostructures with Au. Low EO FE (<3%) was observed for all materials tested.<sup>1</sup> Ke et al. investigated three facets of Ag<sub>3</sub>PO<sub>4</sub> ((100), (110), (111)) for electrochemical propylene oxidation and found that the (100) facet (corresponding to Ag<sub>3</sub>PO<sub>4</sub> cubes) had the highest activity of the three. They used DFT calculations and ATR-FTIRS to prove that the electroepoxidation of propylene (Pr) over Ag<sub>3</sub>PO<sub>4</sub> crystals undergoes an OH-correlated pathway rather than an O-correlated and dehydrogenation pathway. Density functional theory calculations and OH<sup>-</sup> and propylene stripping experiments show that the (100) facet had the lowest

propylene and OH\* adsorption energies of the three Ag<sub>3</sub>PO<sub>4</sub> facets, proving why the (100) facet has the highest activity.<sup>2</sup> Using DFT and ATR-FTIR, Winiwarter et al. thoroughly investigate the pathways of electrochemical propylene oxidation to allyl alcohol, acrolein, and acrylic acid, but only briefly comment on the oxidation of propylene to propylene glycol. They note that propylene glycol is only produced significantly on Pd at potentials >1.0 V<sub>RHE</sub>.<sup>3</sup>

## S1.2 Ethylene and Propylene Electrooxidation Reactions

### Ethylene Electrooxidation Reactions

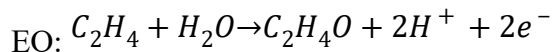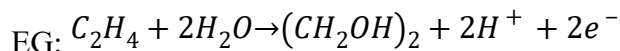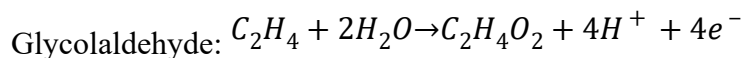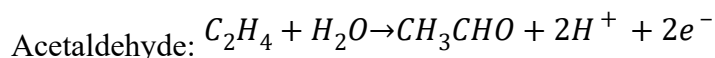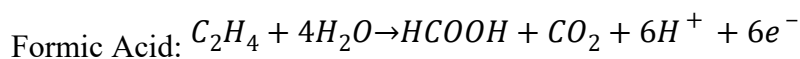

### Propylene Electrooxidation Reactions

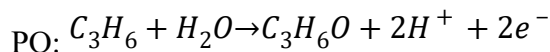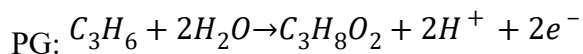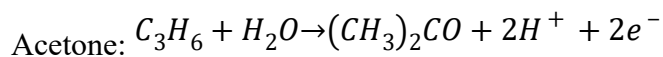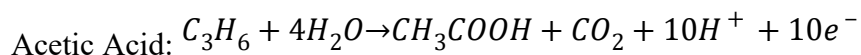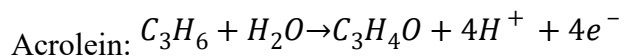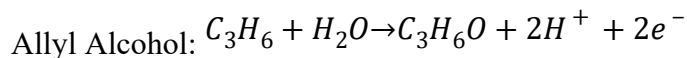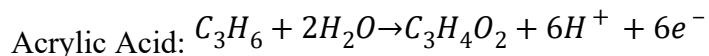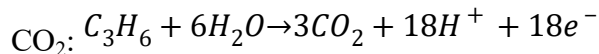

### S1.3 U.S. Ethylene, EO, and EG Production

**Table S2.** U.S. Ethylene, EO, and EG producers and stated production capacities.

| State | Facility Name         | Company Name              | County           | Ethylene tonnes per year | EO tonnes per year | EG tonnes per year | References     |
|-------|-----------------------|---------------------------|------------------|--------------------------|--------------------|--------------------|----------------|
| TX    | Port Arthur (BASF)    | BASF/Total                | Jefferson        | 892,857                  | N/A                | N/A                | 4              |
| TX    | Port Arthur (Baystar) | Bayport Polymers, LLC     | Jefferson        | 892,857                  | N/A                | N/A                | 5<br>6         |
| TX    | Cedar Bayou           | Chevron Phillips Chemical | Harris           | 1,339,286                | N/A                | N/A                | 7<br>8         |
| TX    | Port Arthur (CP Chem) | Chevron Phillips Chemical | Jefferson        | 763,393                  | N/A                | N/A                | 9<br>10        |
| TX    | Sweeny                | Chevron Phillips Chemical | Brazoria         | 597,132                  | N/A                | N/A                | 11<br>12       |
| TX    | Freeport              | Dow Chemical Co.          | Brazoria         | 3,250,000                | N/A                | N/A                | 13             |
| LA    | Plaquemine            | Dow Chemical Co.          | Iberville        | 1,321,429                | 241,071            | 92,857             | 14             |
| LA    | Taft                  | Dow Chemical Co.          | Saint Charles    | 1,000,000                | 687,500            | 625,000            | 15<br>16       |
| TX    | Orange                | Dow Chemical Co.          | Orange           | 882,000                  | N/A                | N/A                | 17             |
| TX    | Longview              | Eastman Chemical Co.      | Gregg            | 892,857                  | 93,750             | 81,018             | 18<br>19<br>16 |
| TX    | Portland              | Exxon/SABIC               | San Patricio     | 787,500                  | N/A                | 982,143            | 20<br>21       |
| LA    | Baton Rouge           | ExxonMobil Chemical Co.   | East Baton Rouge | 571,429                  | N/A                | N/A                | 22             |
| TX    | Baytown (ExxonMobil)  | ExxonMobil Chemical Co.   | Harris           | 1,607,143                | N/A                | N/A                | 23             |
| TX    | Beaumont              | ExxonMobil Chemical Co.   | Jefferson        | 919,643                  | N/A                | N/A                | 24             |



| State | Facility Name                     | Company Name                   | County        | Ethylene tonnes per year | EO tonnes per year | EG tonnes per year | References     |
|-------|-----------------------------------|--------------------------------|---------------|--------------------------|--------------------|--------------------|----------------|
| TX    | Port Arthur (Motiva)              | Motiva                         | Jefferson     | 3,250,000                | N/A                | N/A                | 25             |
| TX    | Point Comfort                     | Formosa Plastics Corp. USA     | Calhoun       | 803,571                  | 223,214            | 1,066,071          | 26             |
| LA    | Carlyss                           | Indorama Ventures Olefins, LLC | Calcasieu     | 330,357                  | N/A                | N/A                | 27             |
| TX    | Port Neches                       | Indorama Ventures Olefins, LLC | Jefferson     | 428,571                  | 1,160,714          | 860,714            | 28             |
| TX    | Chocolate Bayou (INEOS)           | INEOS Olefins and Polymers     | Brazoria      | 1,616,071                | 464,286            | N/A                | 29             |
| TX    | Channelview                       | LyondellBasell Industries      | Harris        | 1,660,714                | N/A                | N/A                | 30<br>31       |
| TX    | Chocolate Bayou (Lyondell Basell) | LyondellBasell Industries      | Brazoria      | 486,607                  | N/A                | N/A                | 32             |
| IA    | Clinton                           | LyondellBasell Industries      | Clinton       | 535,714                  | N/A                | N/A                | 33             |
| TX    | Corpus Christi                    | LyondellBasell Industries      | Nueces        | 1,116,071                | N/A                | N/A                | 34             |
| TX    | La Porte                          | LyondellBasell Industries      | Harris        | 1,026,786                | N/A                | N/A                | 35             |
| IL    | Morris                            | LyondellBasell Industries      | Grundy        | 1,026,786                | N/A                | N/A                | 36             |
| LA    | Geismar                           | Nova Chemicals                 | Ascension     | 870,536                  | N/A                | N/A                | 37             |
| TX    | Ingleside                         | Occidental Chemical/Mexichem   | San Patricio  | 491,071                  | N/A                | N/A                | 38             |
| LA    | Lake Charles (Sasol)              | Sasol                          | Calcasieu     | 1,339,286                | 267,857            | 223,214            | 39<br>40<br>41 |
| TX    | Deer Park                         | Shell Chemicals Ltd.           | Harris        | 750,000                  | N/A                | N/A                | 42             |
| LA    | Norco                             | Shell Chemicals Ltd.           | Saint Charles | 1,486,607                | N/A                | N/A                | 43             |
| LA    | Plaquemine                        | Shinetsu                       | Plaquemine    | 446,429                  | N/A                | N/A                | 44             |

| State | Facility Name            | Company Name                                 | County    | Ethylene tonnes per year | EO tonnes per year                    | EG tonnes per year  | References |
|-------|--------------------------|----------------------------------------------|-----------|--------------------------|---------------------------------------|---------------------|------------|
| KY    | Calvert City             | Westlake Petrochemicals Corp.                | Marshall  | 325,893                  | N/A                                   | N/A                 | 45         |
| LA    | Sulphur                  | Westlake Petrochemicals Corp.                | Calcasieu | 669,643                  | N/A                                   | N/A                 | 46         |
| LA    | Lake Charles (Westlake ) | Westlake/Lotte                               | Calcasieu | 669,643                  | N/A                                   | N/A                 | 45         |
| PA    | Franklin Monaca          | Shell Chemicals Ltd.                         | Beaver    | 1,339,286                | N/A                                   | N/A                 | 47         |
| LA    | Sunshine Project         | Formosa Plastics Corp. USA                   | St. James | 2,142,857                | Produced but no capacity stated       | 1,428,571           | 48         |
| OH    | GC America               | PTT Global Chemical/Marubeni/Daelim Chemical | Belmont   | 1,339,286                | N/A                                   | N/A                 | 47         |
| TX    | Orange                   | Chevron Phillips Chemical Co. LP             | Orange    | 1,339,286                | N/A                                   | N/A                 | 47         |
| TX    | Clear Lake               | Indorama Ventures (Oxide and Glycols)        | Harris    | N/A                      | 388,393                               | 319,643             | 49         |
| TX    | Chocolate Bayou          | Indorama Ventures (Oxide and Glycols)        | Brazoria  | N/A                      | Utilize EO to create various products | N/A                 | 50         |
| TX    | Dayton                   | Indorama Ventures (Oxide and Glycols)        | Liberty   | N/A                      | Utilize EO to create various products | N/A                 | 51         |
| LA    | Geismar                  | BASF                                         | Ascension | N/A                      | 196,429                               | Unable to determine | 52         |
| TX    | Seadrift                 | Dow Chemical Co.                             | Calhoun   | N/A                      | 383,929                               | 232,143             | 19         |
| TX    | Bayport Polymers         | Lyondell Basell                              | Harris    | N/A                      | 321,429                               | 53,571              | 19<br>53   |
| LA    | Geismar                  | Shell Chemicals Ltd.                         | Ascension | N/A                      | 410,714                               | 370,536             | 54         |
| TX    | Oyster Creek             | MEGlobal                                     | Brazoria  | N/A                      | N/A                                   | 669,643             | 55         |

| <b>State</b>   | <b>Facility Name</b>     | <b>Company Name</b> | <b>County</b> | <b>Ethylene tonnes per year</b> | <b>EO tonnes per year</b> | <b>EG tonnes per year</b> | <b>References</b> |
|----------------|--------------------------|---------------------|---------------|---------------------------------|---------------------------|---------------------------|-------------------|
| LA             | Lotte Chemical Louisiana | Lotte Chemical      | Calcasieu     | N/A                             | N/A                       | 625,000                   | 56                |
| <b>Total</b>   |                          |                     |               | 42,679,275                      | 4,839,286                 | 7,630,125                 |                   |
| <b>Average</b> |                          |                     |               | 1,123,139                       | 403,274                   | 579,790                   |                   |
| <b>Median</b>  |                          |                     |               | 892,857                         | 352,679                   | 625,000                   |                   |

## S1.4 U.S. Propylene, PO, and PG Production

**Table S3.** U.S. Propylene, PO, and PG producers and stated production capacities

| Facility State | Facility Name           | Company Name                   | County           | Propylene tonnes per year | PO tonnes per year | PG tonnes per year | References |
|----------------|-------------------------|--------------------------------|------------------|---------------------------|--------------------|--------------------|------------|
| TX             | Port Arthur (BASF)      | BASF/Total                     | Jefferson        | 494,643                   | N/A                | N/A                | 4          |
| TX             | Port Arthur (Baystar)   | Bayport Polymers, LLC          | Jefferson        | 558,036                   | N/A                | N/A                | 5<br>6     |
| TX             | Cedar Bayou             | Chevron Phillips Chemical      | Harris           | 401,786                   | N/A                | N/A                | 7<br>8     |
| TX             | Port Arthur (CP Chem)   | Chevron Phillips Chemical      | Jefferson        | 405,357                   | N/A                | N/A                | 9<br>10    |
| TX             | Sweeny                  | Chevron Phillips Chemical      | Brazoria         | 491,071                   | N/A                | N/A                | 11<br>12   |
| TX             | Freeport                | Dow Chemical Co.               | Brazoria         | 1,133,929                 | 647,321            | N/A                | 13         |
| LA             | Plaquemine              | Dow Chemical Co.               | Iberville        | 321,429                   | 294,643            | 294,643            | 57<br>58   |
| LA             | Taft                    | Dow Chemical Co.               | Saint Charles    | 266,964                   | N/A                | N/A                | 59         |
| LA             | Baton Rouge             | ExxonMobil Chemical Co.        | East Baton Rouge | 866,071                   | N/A                | N/A                | 22         |
| TX             | Baytown (ExxonMobil)    | ExxonMobil Chemical Co.        | Harris           | 857,143                   | N/A                | N/A                | 23         |
| TX             | Port Arthur (Motiva)    | Motiva                         | Jefferson        | 303,571                   | N/A                | N/A                | 25         |
| TX             | Point Comfort           | Formosa Plastics Corp. USA     | Calhoun          | 587,500                   | N/A                | N/A                | 26<br>60   |
| LA             | Carlyss                 | Indorama Ventures Olefins, LLC | Calcasieu        | 26,786                    | N/A                | N/A                | 27         |
| TX             | Port Neches             | Indorama Ventures Olefins, LLC | Jefferson        | 35,714                    | 468,750            | 129,464            | 28         |
| TX             | Chocolate Bayou (INEOS) | INEOS Olefins and Polymers     | Brazoria         | 357,143                   | N/A                | N/A                | 29         |
| TX             | Channelview             | LyondellBasell Industries      | Harris           | 1,375,000                 | 446,429            | N/A                | 30<br>31   |
| TX             | Chocolate Bayou         | LyondellBasell Industries      | Brazoria         | 293,750                   | N/A-               | N/A                | 32         |

| Facility State | Facility Name          | Company Name               | County                       | Propylene tonnes per year | PO tonnes per year | PG tonnes per year  | References |
|----------------|------------------------|----------------------------|------------------------------|---------------------------|--------------------|---------------------|------------|
| TX             | Corpus Christi         | LyondellBasell Industries  | Nueces                       | 254,464                   | N/A                | N/A                 | 34         |
| TX             | La Porte               | LyondellBasell Industries  | Harris                       | 283,036                   | N/A                | N/A                 | 35         |
| LA             | Geismar                | Nova Chemicals             | Ascension                    | 50,893                    | N/A                | N/A                 | 37         |
| TX             | Deer Park              | Shell Chemicals Ltd.       | Harris                       | 446,429                   | N/A                | N/A                 | 42         |
| LA             | Norco                  | Shell Chemicals Ltd.       | Saint Charles                | 642,857                   | N/A                | N/A                 | 43         |
| LA             | Sunshine Project       | Formosa Plastics Corp. USA | St. James                    | 535,714                   | N/A                | N/A                 | 48         |
| TX             | Tyler Refinery         | Delek                      | Smith                        | 81,250                    | N/A                | N/A                 | 59         |
| AR             | El Dorado Refinery     | Delek                      | Union                        | 35,714                    | N/A                | N/A                 | 61         |
| LA             | Garyville Refinery     | Marathon Petroleum         | St. John the Baptist         | 324,107                   | N/A                | N/A                 | 59         |
| LA             | PBF Chalmette Refinery | PDF Energy                 | St. Bernard                  | 121,429                   | N/A                | N/A                 | 59         |
| LA             | Alliance Refinery      | Phillips 66                | Plaquemine                   | 196,429                   | N/A                | N/A                 | 59         |
| LA             | Placid Refinery        | Placid Refining Company    | West Baton Rouge             | 20,536                    | N/A                | N/A                 | 59         |
| LA             | St. Charles Refinery   | Valero                     | St. Charles                  | 80,357                    | N/A                | N/A                 | 59         |
| TX             | No Name                | INVISTA                    | Harris                       | 587,500                   | N/A                | N/A                 | 62<br>63   |
| TX             | No Name                | Enterprise                 | Chambers                     | 4,910,714                 | N/A                | N/A                 | 64<br>63   |
| <u>TX</u>      | No Name                | PetroLogistics             | Undefined Location currently | 446,429                   | N/A                | N/A                 | 65         |
| TX             | Bayport Polymers       | Lyondell Basell            | Harris                       | N/A                       | 535,714            | Capacity not stated | 66         |
| <b>Total</b>   |                        |                            |                              | 17,793,750                | 2,392,857          | 424,107             |            |
| <b>Average</b> |                        |                            |                              | 539,205                   | 478,571            | 212,054             |            |
| <b>Median</b>  |                        |                            |                              | 357,143                   | 468,750            | 212,054             |            |

## S1.5 Calculations for Single-Pass Conversion and Stoichiometric Reaction from Reported Literature Values for Ethylene Systems Example

Lum et al. provided details on the observed cell potentials, current density, electrode area, experimental run times, reactor volumes, and Faradaic efficiencies (FE) for each product. First, the total charge passed,  $Q$ , is calculated from the current density,  $J$ , electrode area,  $A$ , and experimental run time,  $t$ ,

$$Q = J \cdot A \cdot t \quad \text{Eq. 1}$$

The moles of each product formed,  $N_i$ , was calculated from the electron requirement,  $e_i$ , shown in Section S1.2 the reported Faradaic efficiencies for each product,  $FE_i$ , and Faraday's constant,  $F$ .

$$N_i = \frac{FE_i \cdot Q}{e_i \cdot F} \quad \text{Eq. 2}$$

The conversion percentage of ethylene,  $Conv_{eth}$ , is then determined by summing  $N_i$  and the carbon count of each product,  $Carbon_i$ , over the total moles present of ethylene,  $N_{eth,t=0}$ , at the start of the reaction,

$$Conv_{eth} = \frac{\sum_i^n N_i \cdot Carbon_i}{N_{eth,t=0} \cdot Carbon_{eth}} \quad \text{Eq. 3}$$

As the studied literature was primarily done in a batch process, it is assumed that the same conversion would occur per single pass in a gas diffusion electrode assembly in a flow by operation. To model the reaction in SuperPro Designer in a stoichiometric reactor, the number of moles of each product formed per mole of ethylene converted per single pass,  $n_i$ , is determined.

$$n_i = \frac{N_i \cdot Carbon_i}{Conv_{eth} \cdot N_{eth,t=0} \cdot Carbon_{eth}} \quad \text{Eq. 4}$$

## S1.6 Detailed Single Pass Conversion and Carbon Selectivity by System

**Table S4.** Reported reactant single pass conversion percentages and carbon selectivities for studied ethylene electrooxidation literature systems.

| System Name | Single Pass Conversion % | EO    | EG    | Glycolaldehyde | Acetaldehyde | Formic Acid | Source |
|-------------|--------------------------|-------|-------|----------------|--------------|-------------|--------|
| System E1   | 0.0095%                  | 0.8%  | 86.4% | 7.4%           | 2.6%         | 5.6%        | 1      |
| System E2   | 0.0026%                  | 5.7%  | 79.2% | 6.6%           | 8.5%         | N/A         | 1      |
| System E3   | 0.0002%                  | N/A   | 100%  | N/A            | N/A          | N/A         | 1      |
| System E4   | 0.0002%                  | 12.1% | 66.7% | N/A            | 21.2%        | N/A         | 1      |

**Table S5.** Reported reactant single pass conversion percentages and carbon selectivities for studied propylene electrooxidation literature systems.

| System Name | Single Pass Conversion % | PO    | PG    | Acetone | Acetic Acid | Acrolein | Allyl Alcohol | Acrylic Acid | CO <sub>2</sub> | Source |
|-------------|--------------------------|-------|-------|---------|-------------|----------|---------------|--------------|-----------------|--------|
| System P1   | 11.4%                    | 80.8% | N/A   | 14.9%   | 6.5%        | N/A      | N/A           | N/A          | N/A             | 2      |
| System P2   | 14.1%                    | 79.5% | N/A   | 16.6%   | 5.9%        | N/A      | N/A           | N/A          | N/A             | 2      |
| System P3   | 12.4%                    | 73.2% | N/A   | 22.0%   | 7.3%        | N/A      | N/A           | N/A          | N/A             | 2      |
| System P4   | 0.0014%                  | N/A   | 33.6% | 49.4%   | N/A         | 6.9%     | 3.9%          | 0.6%         | 16.5%           | 3      |

## S2. Saturated Aqueous Electrochemical Process Models

### S2.1 Saturated Aqueous Electrochemical Ethylene Process Model

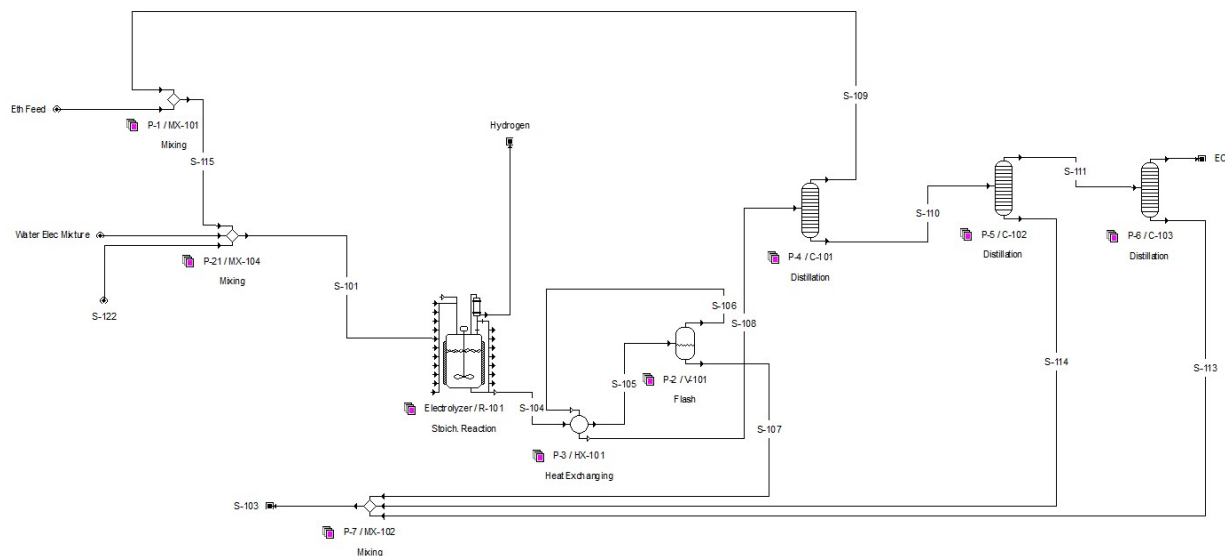

**Figure S1.** Aqueous electrochemical ethylene oxidation process model flow diagram in SuperPro Designer.

The saturated aqueous ethylene electrooxidation process model assumes a 453 ktonnes per year ethylene feed rate at standard temperature and pressure (STP). In this model, a premixed water and electrolyte mixture at STP with a 0.1 M  $\text{NaClO}_4$  concentration at varied total flow rates as shown in Table S6 is mixed with a previously combined fresh ethylene stream and recycled ethylene stream. The water electrolyte mixture was varied to ensure the ethylene is saturated in the electrolyte solution where ethylene has a solubility of 131 mg/L at STP. This stream is then fed to a stoichiometric reactor assuming a 100% carbon selectivity for EO and varied single pass conversion rates as shown in Table S4. A stoichiometric volume of hydrogen is assumed to be produced in this reaction to mimic that of an electrolyzer that is assumed to be separated within the reactor. The reaction is carried out at STP to mimic the conditions of an electrochemical



process. As the unreacted ethylene and EO would be solubilized in this reactor system, both gaseous products must be separated from the liquid stream. This liquid stream from the reactor is passed through a countercurrent shell and tube heat exchanger with an assumed heat transfer coefficient of 1,500 W/m<sup>2</sup>-K to elevate the temperature. The liquid stream is then flashed in a separator set to maximize the recovery of EO in the vapor stream. The liquid stream is discarded, and the vapor stream passed back to the heat exchanger and is then passed to an atmospheric distillation column to recover 99.99% purity ethylene as the distillate to recycle back to the reactor. The liquid stream then passes through two distillation columns to recover the EO. The liquid streams are not shown to be recovered in the model; however, no cost is assumed for the NaClO<sub>4</sub> as the electrolyte could be reutilized as a non-consumable material in the reaction process.

**Table S6.** Electrolyte solution flow rates required to solubilize ethylene at STP in the aqueous ethylene electrooxidation model at varied ethylene single pass conversion percentages.

| <b>Ethylene Single Pass Conversion %</b> | <b>Electrolyte Solution Flow Rate (kL/s)</b> |
|------------------------------------------|----------------------------------------------|
| 10%                                      | 1,100                                        |
| 20%                                      | 540                                          |
| 30%                                      | 360                                          |
| 40%                                      | 270                                          |
| 50%                                      | 210                                          |
| 60%                                      | 175                                          |
| 70%                                      | 150                                          |
| 80%                                      | 130                                          |
| 90%                                      | 120                                          |

## S2.2 Saturated Aqueous Electrochemical Propylene Process Model

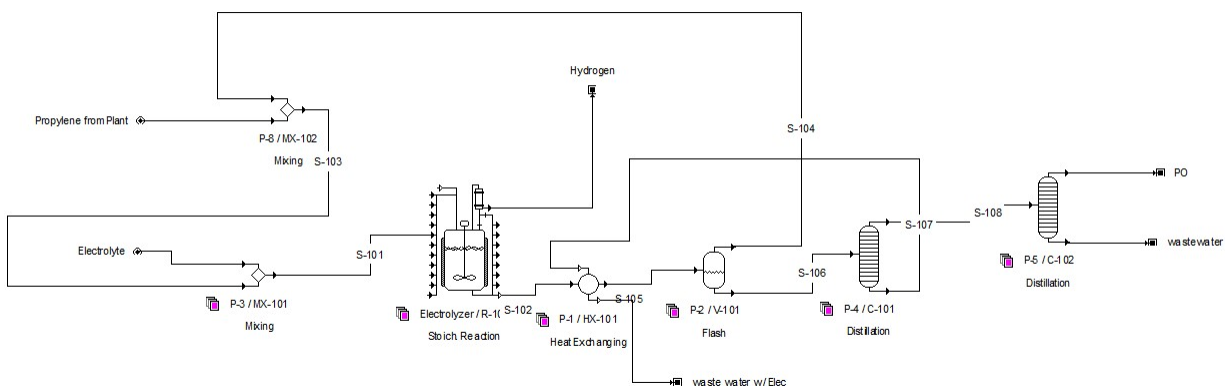

**Figure S2.** Aqueous propylene electrooxidation process model flow diagram.

The saturated aqueous electrochemical propylene electrooxidation model assumes a 181 ktonnes per year propylene feed rate at STP. In this model, a premixed water and electrolyte mixture at STP with a 0.1 M phosphate buffer concentration at varied total flow rates (Table S7) is mixed with a previously combined fresh propylene stream and recycled propylene stream. The water electrolyte mixture was varied to ensure the propylene is saturated in the electrolyte solution where propylene has a solubility of 200 mg/L at STP. This stream is then fed to a stoichiometric reactor assuming a 100% carbon selectivity for PO and varied single pass conversion rates as shown in Table S5. A stoichiometric volume of hydrogen is assumed to be produced in this reaction to mimic that of an electrolyzer that is assumed to be separated within the reactor. The reaction is carried out at STP to mimic the conditions of an electrochemical process. As the unreacted propylene would be solubilized in this reactor system, and PO is a liquid at these conditions, both products must be separated. This liquid stream from the reactor is passed through a countercurrent shell and tube heat exchanger with an assumed heat transfer coefficient of 1,500 W/m<sup>2</sup>-K to elevate the temperature. The liquid stream is then flashed in a separator set

to maximize the recovery of propylene in the vapor stream that is then recycled back to the reactor. The liquid stream is then passed to an atmospheric distillation column to recover 99.99% of the PO. The liquid stream is used to preheat the post reaction liquid stream. A secondary distillation column is utilized to further purify the PO stream. The liquid streams are not shown to be recovered in the model; however, no cost is assumed for the phosphate buffer as the electrolyte could be reutilized as a non-consumable material in the reaction process.

**Table S7.** Electrolyte solution flow rates required to solubilize propylene at STP in the saturated aqueous propylene electrooxidation model at varied propylene single pass conversion percentages.

| <b>Propylene Single Pass Conversion %</b> | <b>Electrolyte Solution Flow Rate (kL/s)</b> |
|-------------------------------------------|----------------------------------------------|
| 10%                                       | 280                                          |
| 20%                                       | 145                                          |
| 30%                                       | 95                                           |
| 40%                                       | 70                                           |
| 50%                                       | 56                                           |
| 60%                                       | 47                                           |
| 70%                                       | 40                                           |
| 80%                                       | 35                                           |
| 90%                                       | 31                                           |

## S3. Gaseous Electrochemical Ethylene Epoxidation Process Models and Additional Results Summaries

### S3.1 System E1 Electrochemical Ethylene Epoxidation Process Model

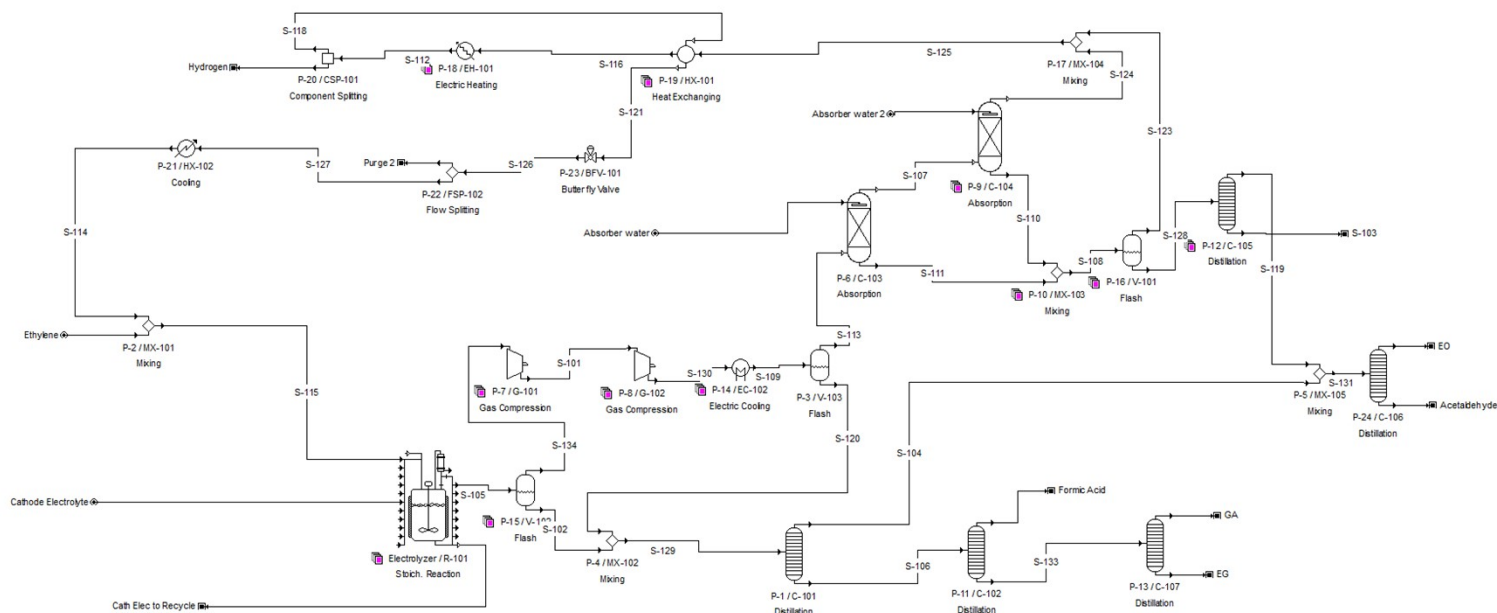

**Figure S3.** Gaseous ethylene electrooxidation process model flow diagram for literature System E1.

The gaseous ethylene electrooxidation process model for System E1 assumes a 453k tonnes per year ethylene feed rate at STP. In this model, a premixed water and electrolyte mixture at STP with a 0.1 M  $\text{NaClO}_4$  concentration is mixed with a previously combined fresh ethylene stream and recycled ethylene stream. This stream is then fed to a stoichiometric reactor assuming carbon selectivities as stated in Table S4 and varied single pass conversion rates as shown in Table S8. A stoichiometric volume of hydrogen is assumed to be produced in this reaction to mimic that of an electrolyzer. The reaction is carried out at STP to mimic the conditions of an electrochemical process. To model the reactor like an electrolyzer, the reactor is set to split the streams with all cathode side products, unreacted ethylene, hydrogen, and oxygen leaving the top of the reactor and the water and electrolyte (anode side) leaving the bottom of the reactor. The anode side

stream recycle is not shown in the figure; however, the cost for this stream is set to zero to account for the potential to recycle the stream.

The cathode side components leaving the reactor for System E1 are ethylene, EO, acetaldehyde, EG, glycolaldehyde, formic acid, H<sub>2</sub>, and O<sub>2</sub>. As SuperPro Designer does not have a built in electrolyzer unit operation, we determined energy requirements, maintenance costs, and capital cost of the reactor with an external model based on the DOE H2A model.<sup>67</sup>

The cathode side stream from the reactor is sent to a flash vessel at 25 °C and 1 bar to recover as much of the liquid stream as possible modeled by Henry's Law in the process design software. The remaining gaseous products from the reactor are compressed via a two-stage compressor system (80% efficiency) with interstage electric cooling to 30 bar. The stream then passes to another separator to remove as much of the liquids as possible to be sent to the liquid recovery train. The compressed gas stream then passes through a first absorption column fed with water at 25 °C at 30 bar at varied required rates shown in Table S8. At these conditions, 53.15% of the acetaldehyde, 53.15% of the EO, 0.4385% of the ethylene, and 0.02% of the hydrogen is assumed to be absorbed<sup>68</sup>. The unabsorbed gases then pass through a second absorption column with the same assumed absorption percentages to try and recover as much of the products as possible. The bottoms streams from both absorbers are combined and heated to 50 °C where the ethylene and H<sub>2</sub> are released and sent to a recycle train. The liquid stream from the flash vessel passes through a distillation column designed to recover 99.99% of both the acetaldehyde and EO in the distillate with the bottoms containing water. The distillate stream passes through a second distillation column designed to produce >90% by mass purity of EO with acetaldehyde as a bottoms stream.

The liquid stream is then passed to an atmospheric distillation column designed to recover the EO and acetaldehyde from the distillate that is then combined with the distillation from the gas side of the process to recover each product individually. The liquid stream now containing formic acid, glycolaldehyde, and EG is passed to a second atmospheric distillation column set to recover 99.99% of the formic acid in the distillate. The bottoms stream of the second atmospheric distillation column containing primarily EG and glycolaldehyde are then passed to a third distillation column to separate the glycolaldehyde as the distillate and EG as the bottoms stream.

The recycle train of the system begins with the mixing of the unabsorbed gases from the absorber train that contains ethylene, unabsorbed EO, unabsorbed acetaldehyde, H<sub>2</sub>, and O<sub>2</sub>. The stream passes through a countercurrent heat exchanger followed by an electric heater are used to elevate the temperature to 200 °C. The heated stream is then split by a component splitter set to mimic a hydrogen separating membrane due to the lack of such a unit operation in SuperPro designer. The component splitter is assumed to recover 99% of the hydrogen as reported by available products from Air Liquide <sup>69</sup>. The remaining gas stream is then passed to the shell side of the countercurrent heat exchanger before passing through a butterfly valve to lower the pressure back to just over 1 atm. The stream then passes through a flow splitter used to mimic a purge system. The percentage of the stream that is purged is varied as shown in Table S8 to ensure that the ethylene stream fed to the reactor maintains an ethylene purity of >98% by mass. The remaining gas stream in the recycle loop is then cooled via an electric cooler to 25 °C before combining with the pure ethylene feed to reenter the system.

**Table S8.** Absorber water requirements and purge percentage requirements for the process model for System E1. Absorber water volumes are the minimum required flow rates to operate the column. Purge percentages are set to maintain a 98% purity of ethylene being fed to the reactor.

| <b>Ethylene Single Pass Conversion %</b> | <b>Absorber 1 Water Requirement (kmol/h)</b> | <b>Absorber 2 Water Requirement (kmol/h)</b> | <b>Purge Percentage</b> |
|------------------------------------------|----------------------------------------------|----------------------------------------------|-------------------------|
| 0.01%                                    | 29,000                                       | 29,000                                       | 50%                     |
| 10%                                      | 59,400                                       | 59,100                                       | 20%                     |
| 20%                                      | 40,300                                       | 40,200                                       | 33%                     |
| 30%                                      | 34,600                                       | 34,500                                       | 43.0%                   |
| 40%                                      | 32,700                                       | 32,700                                       | 50.0%                   |
| 50%                                      | 32,000                                       | 31,900                                       | 56.0%                   |
| 60%                                      | 32,200                                       | 32,100                                       | 60.0%                   |
| 70%                                      | 32,600                                       | 32,500                                       | 64%                     |
| 80%                                      | 34,300                                       | 34,200                                       | 67%                     |
| 90%                                      | 34,300                                       | 34,200                                       | 71%                     |

### S3.2 System E2 Electrochemical Ethylene Epoxidation Process Model

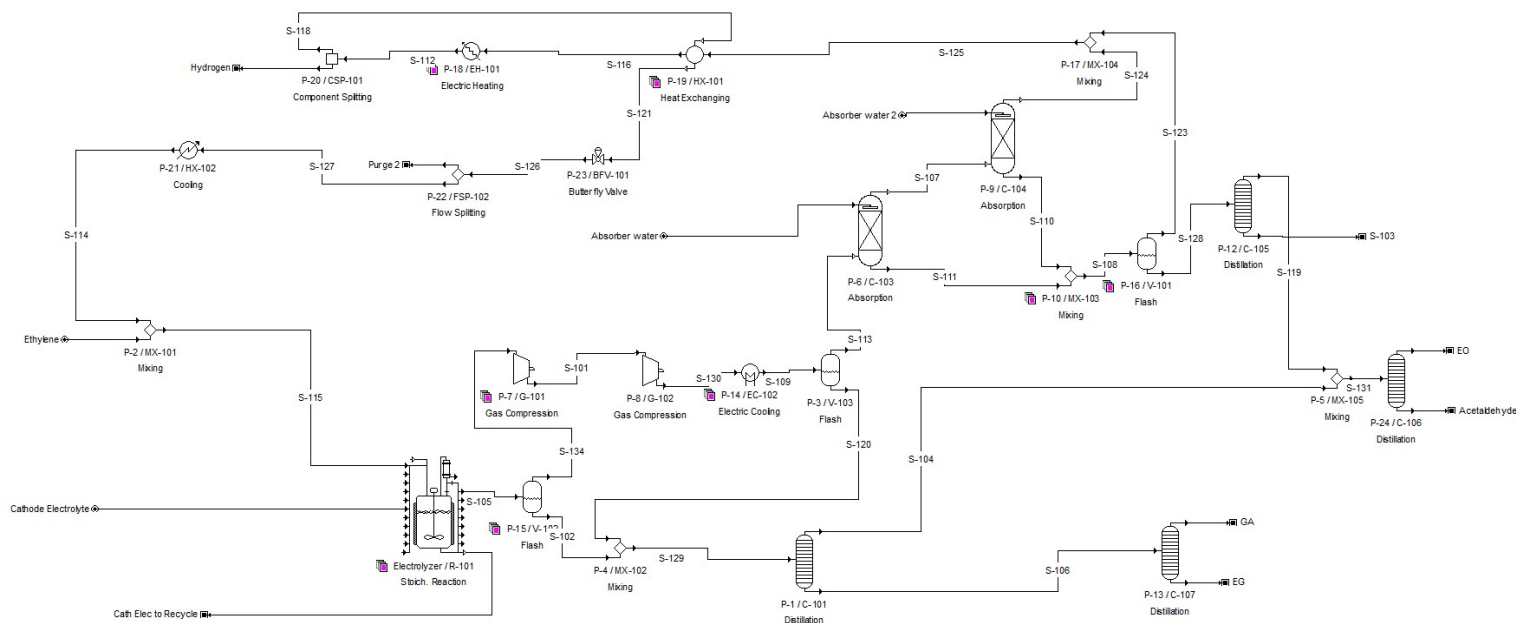

**Figure S4.** Gaseous ethylene electrooxidation process model flow diagram for literature System E2.

The gaseous ethylene electrooxidation process model for System E2 assumes a 453 ktonnes per year ethylene feed rate at STP. In this model, a premixed water and electrolyte mixture at STP with a 0.1 M  $\text{NaClO}_4$  concentration is mixed with a previously combined fresh ethylene stream and recycled ethylene stream. This stream is then fed to a stoichiometric reactor assuming carbon selectivities as stated in Table S4 and varied single pass conversion rates as shown in Table S9. A stoichiometric volume of hydrogen is assumed to be produced in this reaction to mimic that of an electrolyzer. The reaction is carried out at STP to mimic the conditions of an electrochemical process. To model the reactor like an electrolyzer, the reactor is set to split the streams with all cathode side products, unreacted ethylene, hydrogen, and oxygen leaving the top of the reactor and the water and electrolyte (anode side) leaving the bottom of the reactor. The anode side



stream recycle is not shown in the figure; however, the cost for this stream is set to zero to account for the potential to recycle the stream.

The cathode side components leaving the reactor for System E2 are ethylene, EO, acetaldehyde, EG, glycolaldehyde, H<sub>2</sub>, and O<sub>2</sub>. As SuperPro Designer does not have a built in electrolyzer unit operation, we determined energy requirements, maintenance costs, and capital cost of the reactor with an external model based on the DOE H2A model.<sup>67</sup>

The cathode side stream from the reactor is sent to a flash vessel at 25 °C and 1 bar to recover as much of the liquid stream as possible modeled by Henry's Law in the process design software. The remaining gaseous products from the reactor are compressed via a two-stage compressor system (80% efficiency) with interstage electric cooling to 30 bar. The stream then passes to another separator to remove as much of the liquids as possible to be sent to the liquid recovery train. The compressed gas stream then passes through a first absorption column fed with water at 25 °C at 30 bar at varied required rates shown in Table S9. At these conditions, 53.15% of the acetaldehyde, 53.15% of the EO, 0.4385% of the ethylene, and 0.02% of the hydrogen is assumed to be absorbed<sup>68</sup>. The unabsorbed gases then pass through a second absorption column with the same assumed absorption percentages to try and recover as much of the products as possible. The bottoms streams from both absorbers are combined and heated to 50 °C where the ethylene and H<sub>2</sub> are released and sent to a recycle train. The liquid stream from the flash vessel passes through a distillation column designed to recover 99.99% of both the acetaldehyde and EO in the distillate with the bottoms containing water. The distillate stream passes through a second distillation column designed to produce >90% by mass purity of EO with acetaldehyde as a bottoms stream.

The liquid stream is then passed to an atmospheric distillation column designed to recover the EO and acetaldehyde from the distillate that is then combined with the distillation from the gas side of the process to recover each product individually. The liquid stream now containing glycolaldehyde and EG is passed to a second atmospheric distillation column to separate the glycolaldehyde as the distillate and EG as the bottoms stream.

The recycle train of the system begins with the mixing of the unabsorbed gases from the absorber train that contains ethylene, unabsorbed EO, unabsorbed acetaldehyde, H<sub>2</sub>, and O<sub>2</sub>. The stream passes through a countercurrent heat exchanger followed by an electric heater are used to elevate the temperature to 200 °C. The heated stream is then split by a component splitter set to mimic a hydrogen separating membrane due to the lack of such a unit operation in SuperPro designer. The component splitter is assumed to recover 99% of the hydrogen as reported by available products from Air Liquide <sup>69</sup>. The remaining gas stream is then passed to the shell side of the countercurrent heat exchanger before passing through a butterfly valve to lower the pressure back to just over 1 atm. The stream then passes through a flow splitter used to mimic a purge system. The percentage of the stream that is purged is varied as shown in Table S9 to ensure that the ethylene stream fed to the reactor maintains an ethylene purity of >98% by mass. The remaining gas stream in the recycle loop is then cooled via an electric cooler to 25 °C before combining with the pure ethylene feed to reenter the system.

**Table S9.** Absorber water requirements and purge percentage requirements for the process model for System E2. Absorber water volumes are the minimum required flow rates to operate the column. Purge percentages are set to maintain a 98% purity of ethylene being fed to the reactor.

| <b>Ethylene Single Pass Conversion %</b> | <b>Absorber 1 Water Requirement (kmol/h)</b> | <b>Absorber 2 Water Requirement (kmol/h)</b> | <b>Purge Percentage</b> |
|------------------------------------------|----------------------------------------------|----------------------------------------------|-------------------------|
| 0.01%                                    | 35,800                                       | 35,600                                       | 40%                     |
| 10%                                      | 24,400                                       | 24,200                                       | 71.2%                   |
| 20%                                      | 25,000                                       | 24,700                                       | 83.2%                   |
| 30%                                      | 27,400                                       | 27,100                                       | 88.2%                   |
| 40%                                      | 30,300                                       | 30,000                                       | 91.0%                   |
| 50%                                      | 33,300                                       | 33,000                                       | 92.6%                   |
| 60%                                      | 36,500                                       | 36,100                                       | 93.7%                   |
| 70%                                      | 39,700                                       | 39,300                                       | 94.6%                   |
| 80%                                      | 43,000                                       | 42,500                                       | 95.2%                   |
| 90%                                      | 46,300                                       | 45,700                                       | 95.7%                   |

### S3.3 System E3 Electrochemical Ethylene Epoxidation Process Model

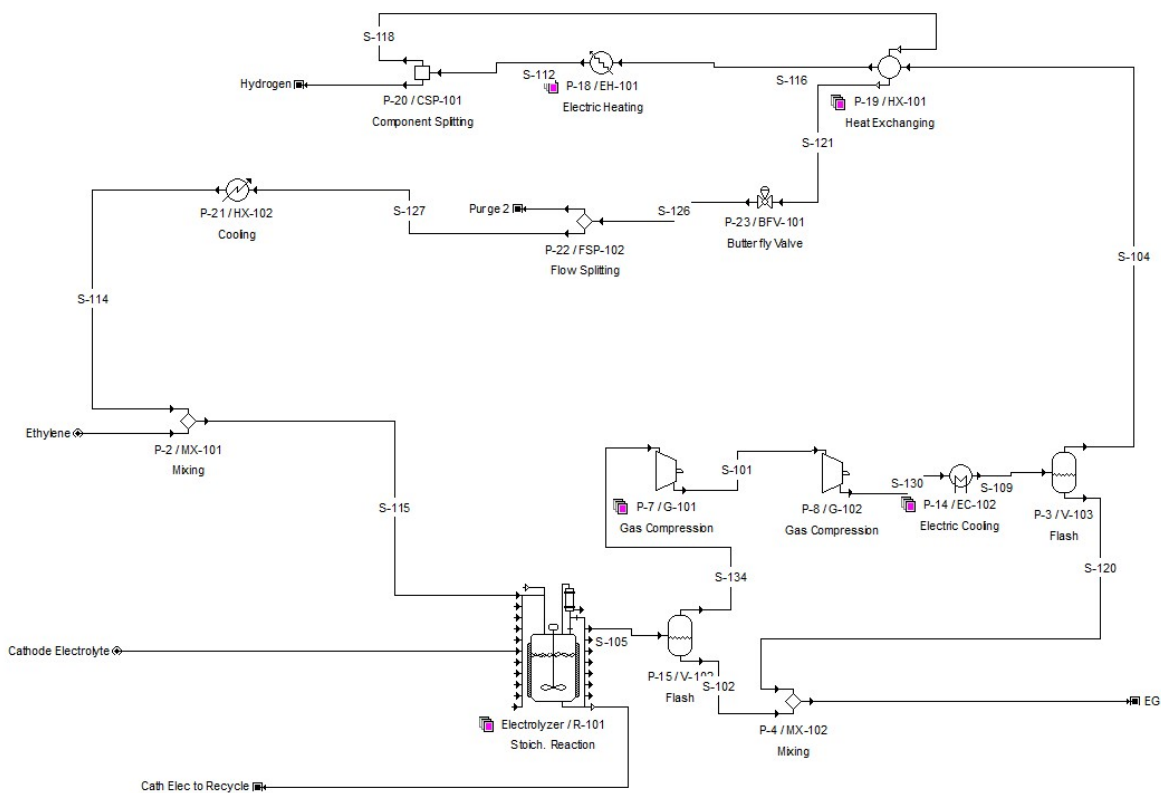

**Figure S5.** Gaseous ethylene electrooxidation process model flow diagram for literature System E3.

The gaseous ethylene electrooxidation process model for System E3 assumes a 453 ktonnes per year ethylene feed rate at STP. In this model, a premixed water and electrolyte mixture at STP with a 0.1 M NaClO<sub>4</sub> concentration is mixed with a previously combined fresh ethylene stream and recycled ethylene stream. This stream is then fed to a stoichiometric reactor assuming carbon selectivities as stated in Table S4 and varied single pass conversion rates as shown in Table S10. A stoichiometric volume of hydrogen is assumed to be produced in this reaction to mimic that of an electrolyzer. The reaction is carried out at STP to mimic the conditions of an electrochemical process. To model the reactor like an electrolyzer, the reactor is set to split the streams with all cathode side products, unreacted ethylene, hydrogen, and oxygen leaving the top of the reactor

and the water and electrolyte (anode side) leaving the bottom of the reactor. The anode side stream recycle is not shown in the figure; however, the cost for this stream is set to zero to account for the potential to recycle the stream.

The cathode side components leaving the reactor for System E3 are ethylene, EG, H<sub>2</sub>, and O<sub>2</sub>. As SuperPro Designer does not have a built in electrolyzer unit operation, we determined energy requirements, maintenance costs, and capital cost of the reactor with an external model based on the DOE H2A model.<sup>67</sup>

The cathode side stream from the reactor is sent to a flash vessel at 25 °C and 1 bar to recover as much of the liquid stream as possible modeled by Henry's Law in the process design software.

The remaining gaseous products from the reactor are compressed via a two-stage compressor system (80% efficiency) with interstage electric cooling to 30 bar. The stream then passes to another separator to remove as much of the liquids as possible to be sent to the liquid recovery train. In this case, the only liquid product is EG that is then combined with the outlet of the first separator and at 98% or greater purity.

The recycle train of the system begins with a countercurrent heat exchanger followed by an electric heater to elevate the temperature to 200 °C followed by a component splitter set to mimic a hydrogen separating membrane due to the lack of such a unit operation in SuperPro designer.

The component splitter is assumed to recover 99% of the hydrogen as reported by available products from Air Liquide.<sup>69</sup> The remaining gas stream is then passed to the shell side of the countercurrent heat exchanger before passing through a butterfly valve to lower the pressure back to just over 1 atm. The stream then passes through a flow splitter used to mimic a purge system. The percentage of the stream that is purged is varied as shown in Table S10 to ensure that the ethylene stream fed to the reactor maintains an ethylene purity of >98% by mass. The

remaining gas stream in the recycle loop is then cooled via an electric cooler to 25 °C before combining with the pure ethylene feed to reenter the system.

**Table S10.** Absorber water requirements and purge percentage requirements for the process model for System E3. Purge percentages are set to maintain a 98% purity of ethylene being fed to the reactor.

| <b>Ethylene Single Pass Conversion %</b> | <b>Purge Percentage</b> |
|------------------------------------------|-------------------------|
| 0.01%                                    | 94.2%                   |
| 10%                                      | 95.30%                  |
| 20%                                      | 97.70%                  |
| 30%                                      | 98.40%                  |
| 40%                                      | 98.70%                  |
| 50%                                      | 99.10%                  |
| 60%                                      | 99.20%                  |
| 70%                                      | 99.30%                  |
| 80%                                      | 99.40%                  |
| 90%                                      | 99.50%                  |

### S3.4 System E4 Electrochemical Ethylene Epoxidation Process Model

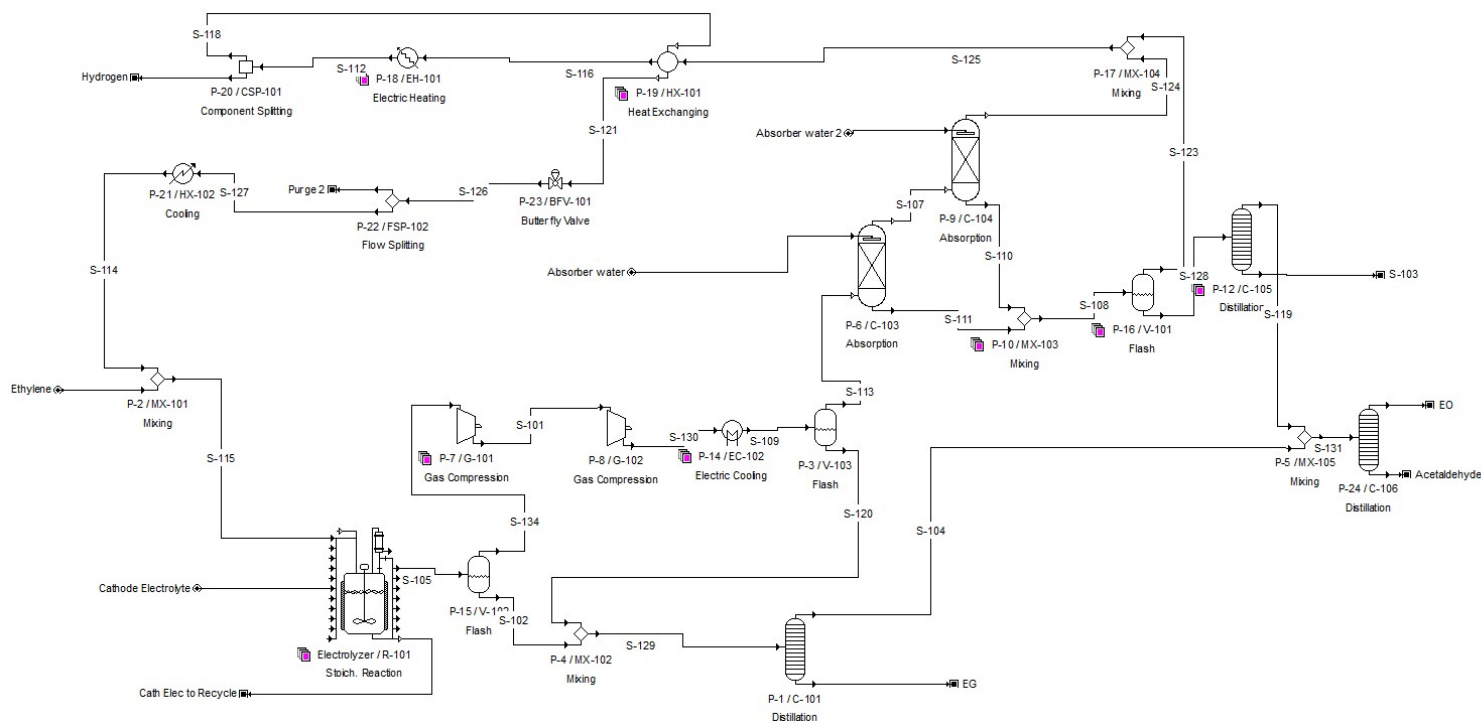

**Figure S6.** Gaseous ethylene electrooxidation process model flow diagram for literature System E4.

The gaseous ethylene electrooxidation process model for System E4 assumes a 453 ktonnes per year ethylene feed rate at STP. In this model, a premixed water and electrolyte mixture at STP with a 0.1 M  $\text{NaClO}_4$  concentration is mixed with a previously combined fresh ethylene stream and recycled ethylene stream. This stream is then fed to a stoichiometric reactor assuming carbon selectivities as stated in Table S4 and varied single pass conversion rates as shown in Table S11. A stoichiometric volume of hydrogen is assumed to be produced in this reaction to mimic that of an electrolyzer. The reaction is carried out at STP to mimic the conditions of an electrochemical process. To model the reactor like an electrolyzer, the reactor is set to split the streams with all cathode side products, unreacted ethylene, hydrogen, and oxygen leaving the top of the reactor and the water and electrolyte (anode side) leaving the bottom of the reactor. The anode side

stream recycle is not shown in the figure; however, the cost for this stream is set to zero to account for the potential to recycle the stream.

The cathode side components leaving the reactor for System E4 are ethylene, EO, acetaldehyde, EG, glycolaldehyde, H<sub>2</sub>, and O<sub>2</sub>. As SuperPro Designer does not have a built in electrolyzer unit operation, we determined energy requirements, maintenance costs, and capital cost of the reactor with an external model created based on the DOE H2A model.<sup>67</sup>

The cathode side stream from the reactor is sent to a flash vessel at 25 °C and 1 bar to recover as much of the liquid stream as possible modeled by Henry's Law in the process design software. The remaining gaseous products from the reactor are compressed via a two-stage compressor system (80% efficiency) with interstage electric cooling to 30 bar. The stream then passes to another separator to remove as much of the liquids as possible to be sent to the liquid recovery train. The compressed gas stream then passes through a first absorption column fed with water at 25 °C at 30 bar at varied required rates shown in Table S11. Under these conditions, 53.15% of the acetaldehyde, 53.15% of the EO, 0.4385% of the ethylene, and 0.02% of the hydrogen is assumed to be absorbed.<sup>68</sup> The unabsorbed gases then pass through a second absorption column with the same assumed absorption percentages to try and recover as much of the products as possible. The bottoms streams from both absorbers are combined and heated to 50 °C where the ethylene and H<sub>2</sub> are released and sent to a recycle train. The liquid stream from the flash vessel passes through a distillation column designed to recover 99.99% of both the acetaldehyde and EO in the distillate with the bottoms containing water. The distillate stream passes through a second distillation column designed to produce >90% by mass purity of EO with acetaldehyde as a bottoms stream.



The liquid stream is then passed to an atmospheric distillation column designed to recover the EO and acetaldehyde from the distillate that is then combined with the distillation from the gas side of the process to recover each product individually. The liquid stream now containing glycolaldehyde and EG is passed to a second atmospheric distillation column to separate the glycolaldehyde as the distillate and EG as the bottoms stream.

The recycle train of the system begins with the mixing of the unabsorbed gases from the absorber train that contains ethylene, unabsorbed EO, unabsorbed acetaldehyde, H<sub>2</sub>, and O<sub>2</sub>. The stream passes through a countercurrent heat exchanger followed by an electric heater are used to elevate the temperature to 200 °C. The heated stream is then split by a component splitter set to mimic a hydrogen separating membrane due to the lack of such a unit operation in SuperPro designer. The component splitter is assumed to recover 99% of the hydrogen as reported by available products from Air Liquide.<sup>69</sup> The remaining gas stream is then passed to the shell side of the countercurrent heat exchanger before passing through a butterfly valve to lower the pressure back to just over 1 atm. The stream then passes through a flow splitter used to mimic a purge system. The percentage of the stream that is purged is varied as shown in Table S11 to ensure that the ethylene stream fed to the reactor maintains an ethylene purity of >98% by mass. The remaining gas stream in the recycle loop is then cooled via an electric cooler to 25 °C before combining with the pure ethylene feed to reenter the system.

**Table S11.** Absorber water requirements and purge percentage requirements for the process model for System E4. Absorber water volumes are the minimum required flow rates to operate the column. Purge percentages are set to maintain a 98% purity of ethylene being fed to the reactor. Purge percentages are notably higher in this reaction to account for the significantly lower Faradaic efficiency resulting in increased oxygen production not otherwise removed from the recycle loop.

| <b>Ethylene Single Pass Conversion %</b> | <b>Absorber 1 Water Requirement (kmol/h)</b> | <b>Absorber 2 Water Requirement (kmol/h)</b> | <b>Purge Percentage</b> |
|------------------------------------------|----------------------------------------------|----------------------------------------------|-------------------------|
| 0.01%                                    | 15,900                                       | 15,900                                       | 90.00%                  |
| 10%                                      | 28,700                                       | 28,600                                       | 93.50%                  |
| 20%                                      | 40,600                                       | 40,400                                       | 96.70%                  |
| 30%                                      | 52,800                                       | 52,600                                       | 97.70%                  |
| 40%                                      | 65,100                                       | 64,800                                       | 98.30%                  |
| 50%                                      | 77,400                                       | 77,000                                       | 98.70%                  |
| 60%                                      | 89,800                                       | 89,300                                       | 98.90%                  |
| 70%                                      | 102,200                                      | 101,600                                      | 99.00%                  |
| 80%                                      | 114,599                                      | 113,900                                      | 99.20%                  |
| 90%                                      | 126,899                                      | 126,100                                      | 99.30%                  |

### S3.5 Theoretical Electrochemical Ethylene Epoxidation Process Model

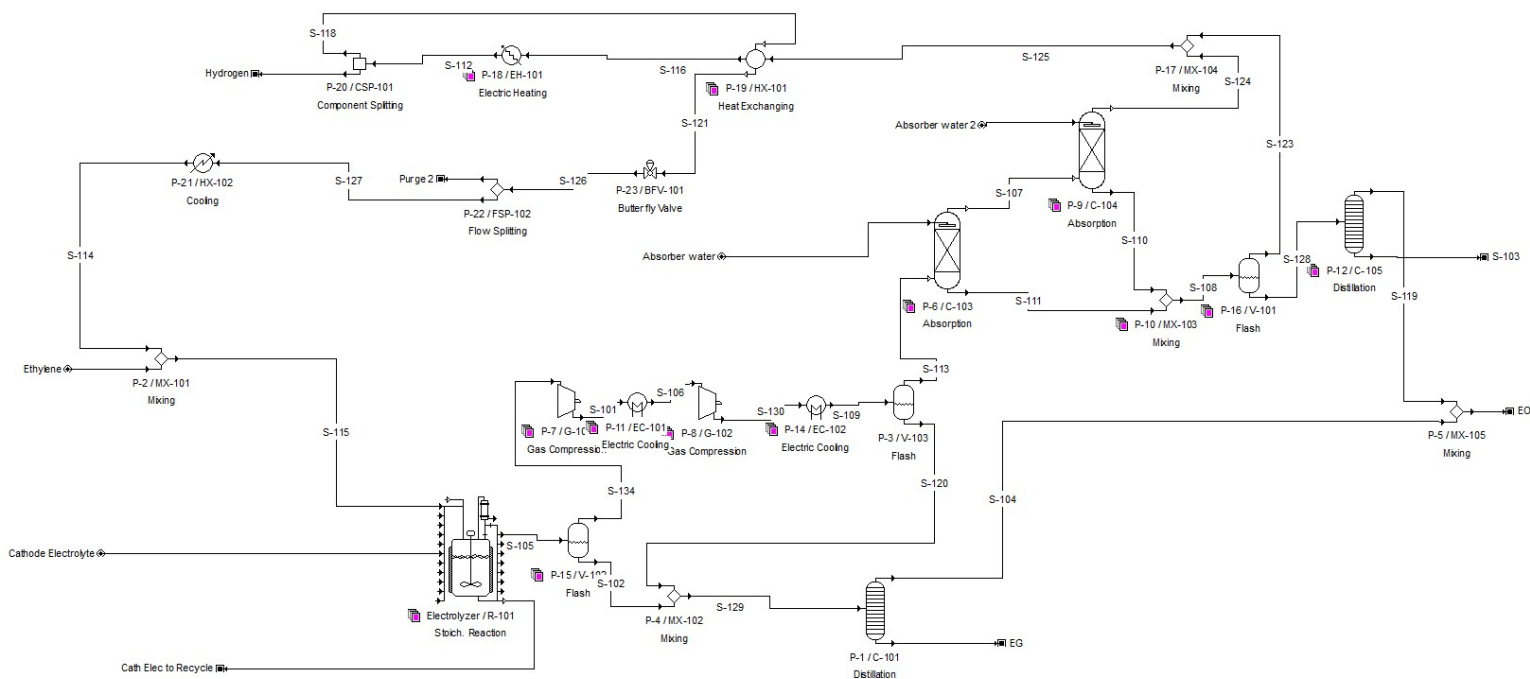

**Figure S7.** Gaseous ethylene electrooxidation process model flow diagram for theoretical reactions with varied single pass conversions and selectivities for EO versus EG.

The gaseous electrochemical ethylene electrooxidation process models for theoretical reactions with varied single pass conversions and selectivities for EO vs EG assumes a 453 ktonnes per year ethylene feed rate at STP. In this model, water and electrolyte are mixed at STP with a 0.1 M  $\text{NaClO}_4$  concentration is mixed with a previously combined fresh ethylene stream and recycled ethylene stream. This stream is then fed to a stoichiometric reactor assuming varied carbon selectivities for EO/EG with no other side products outlined in Table S12 and varied single pass conversion rates also shown in Table S12. A stoichiometric volume of hydrogen is assumed to be produced in this reaction to mimic that of an electrolyzer. 100% Faradaic efficiency is assumed in this model to aid in identification of the economically preferred product that can be formed in this theoretical scenario. To model the reactor like an electrolyzer, the

reactor is set to split the streams with all cathode side products (EO and/or EG), unreacted ethylene, hydrogen, and oxygen leaving the top of the reactor and the water and electrolyte (anode side) leaving the bottom of the reactor. The anode side stream recycle is not shown in the figure; however, the cost for this stream is set to zero to account for the potential to recycle the stream.

The cathode side components leaving the reactor are ethylene, EO, EG, H<sub>2</sub>, and O<sub>2</sub>. As SuperPro Designer does not have a built in electrolyzer unit operation, we determined energy requirements, maintenance costs, and capital cost of the reactor with an external model based on the DOE H2A model.<sup>67</sup>

The cathode side stream from the reactor is sent to a flash vessel at 25 °C and 1 bar to recover as much of the liquid stream as possible modeled by Henry's Law in the process design software. The remaining gaseous products from the reactor are compressed via a two-stage compressor system (80% efficiency) with interstage electric cooling to 30 bar. The stream then passes to another separator to remove as much of the liquids as possible to be sent to the liquid recovery train. The compressed gas stream then passes through a first absorption column fed with water at 25 °C at 30 bar at varied required rates shown in Table S12. Under these conditions, 53.15% of the acetaldehyde, 53.15% of the EO, 0.4385% of the ethylene, and 0.02% of the hydrogen is assumed to be absorbed.<sup>68</sup> The unabsorbed gases then pass through a second absorption column with the same assumed absorption percentages to try and recover as much of the products as possible. The bottoms streams from both absorbers are combined and heated to 50 °C where the ethylene and H<sub>2</sub> are released and sent to a recycle train. The liquid stream from the flash vessel passes through a distillation column designed to recover 99.99% of the EO in the distillate with the bottoms containing water.

The liquid stream is then passed to an atmospheric distillation column designed to recover the EO from the distillate and the EG from the bottoms stream.

The recycle train of the system begins with the mixing of the unabsorbed gases from the absorber train that contains ethylene, unabsorbed EO, unabsorbed acetaldehyde, H<sub>2</sub>, and O<sub>2</sub>. The stream passes through a countercurrent heat exchanger followed by an electric heater used to elevate the temperature to 200 °C. The heated stream is then split by a component splitter set to mimic a hydrogen separating membrane due to the lack of such a unit operation in SuperPro designer. The component splitter is assumed to recover 99% of the hydrogen as reported by available products from Air Liquide.<sup>69</sup> The remaining gas stream is then passed to the shell side of the countercurrent heat exchanger before passing through a butterfly valve to lower the pressure back to just over 1 atm. The stream then passes through a flow splitter used to mimic a purge system. The percentage of the stream that is purged is varied as shown in Table S12 to ensure that the ethylene stream fed to the reactor maintains an ethylene purity of >98% by mass. The remaining gas stream in the recycle loop is then cooled via an electric cooler to 25 °C before combining with the pure ethylene feed to reenter the system.

**Table S12.** Absorber water requirements and purge percentage requirements for the process models for theoretical reactions with varied single pass conversions and selectivities for EO versus EG. Absorber water volumes are the minimum required flow rates to operate the column. Purge percentages are set to maintain a 98% purity of ethylene being fed to the reactor. Purge percentages are notably higher in this reaction to account for the significantly lower Faradaic efficiency resulting in increased oxygen production not otherwise removed from the recycle loop.

| Selectivity for EO/Selectivity for EG | Ethylene Single Pass Conversion % | Absorber 1 Water Requirement (kmol/h) | Absorber 2 Water Requirement (kmol/h) | Purge Percentage |
|---------------------------------------|-----------------------------------|---------------------------------------|---------------------------------------|------------------|
| 100% EO<br>0% EG                      | 10%                               | 27,200                                | 25,600                                | 47.7%            |
|                                       | 20%                               | 18,300                                | 16,400                                | 72.3%            |
|                                       | 30%                               | 16,300                                | 13,800                                | 81.1%            |
|                                       | 40%                               | 15,400                                | 12,200                                | 85.7%            |
|                                       | 50%                               | 14,800                                | 11,000                                | 88.5%            |
|                                       | 60%                               | 14,400                                | 9,900                                 | 90.4%            |
|                                       | 70%                               | 14,100                                | 8,910                                 | 91.7%            |
|                                       | 80%                               | 13,800                                | 8,000                                 | 92.8%            |
|                                       | 90%                               | 13,600                                | 7,200                                 | 93.6%            |
| 90% EO<br>10% EG                      | 10%                               | 79,800                                | 77,300                                | 12.5%            |
|                                       | 20%                               | 50,900                                | 49,300                                | 21.3%            |
|                                       | 30%                               | 41,400                                | 31,200                                | 28.6%            |
|                                       | 40%                               | 37,300                                | 36,200                                | 34.2%            |
|                                       | 50%                               | 35,000                                | 34,000                                | 39.7%            |
|                                       | 60%                               | 34,000                                | 33,000                                | 43.7%            |
|                                       | 70%                               | 33,500                                | 32,500                                | 47.5%            |
|                                       | 80%                               | 33,400                                | 32,400                                | 50.5%            |
|                                       | 90%                               | 33,500                                | 33,200                                | 54.0%            |
| 80% EO<br>20% EG                      | 10%                               | 80,500                                | 78,000                                | 12.3%            |
|                                       | 20%                               | 51,000                                | 49,400                                | 21.2%            |
|                                       | 30%                               | 41,500                                | 40,200                                | 28.5%            |
|                                       | 40%                               | 37,400                                | 36,200                                | 34.2%            |
|                                       | 50%                               | 35,100                                | 34,100                                | 39.4%            |
|                                       | 60%                               | 34,000                                | 33,000                                | 43.8%            |
|                                       | 70%                               | 33,500                                | 32,500                                | 47.3%            |
|                                       | 80%                               | 33,400                                | 32,400                                | 50.7%            |
|                                       | 90%                               | 33,500                                | 32,500                                | 53.6%            |
| 70% EO                                | 10%                               | 81,800                                | 79,300                                | 11.9%            |

| Selectivity for EO/Selectivity for EG | Ethylene Single Pass Conversion % | Absorber 1 Water Requirement (kmol/h) | Absorber 2 Water Requirement (kmol/h) | Purge Percentage |
|---------------------------------------|-----------------------------------|---------------------------------------|---------------------------------------|------------------|
| 30% EG                                | 20%                               | 51,100                                | 49,500                                | 21.1%            |
|                                       | 30%                               | 41,600                                | 40,300                                | 28.3%            |
|                                       | 40%                               | 37,300                                | 36,200                                | 34.2%            |
|                                       | 50%                               | 35,100                                | 34,100                                | 39.2%            |
|                                       | 60%                               | 34,000                                | 33,000                                | 43.5%            |
|                                       | 70%                               | 33,500                                | 32,500                                | 47.3%            |
|                                       | 80%                               | 33,400                                | 32,400                                | 50.7%            |
|                                       | 90%                               | 33,500                                | 32,600                                | 53.4%            |
| 60% EO<br>40% EG                      | 10%                               | 87,100                                | 84,400                                | 10.5%            |
|                                       | 20%                               | 51,100                                | 49,500                                | 21.1%            |
|                                       | 30%                               | 41,600                                | 40,400                                | 28.2%            |
|                                       | 40%                               | 37,300                                | 36,200                                | 34.2%            |
|                                       | 50%                               | 35,100                                | 34,100                                | 39.2%            |
|                                       | 60%                               | 34,000                                | 33,000                                | 43.5%            |
|                                       | 70%                               | 33,500                                | 32,500                                | 47.3%            |
|                                       | 80%                               | 33,400                                | 32,400                                | 50.7%            |
|                                       | 90%                               | 33,500                                | 32,600                                | 53.4%            |
| 50% EO<br>50% EG                      | 10%                               | 142,800                               | 138,700                               | 2.0%             |
|                                       | 20%                               | 51,300                                | 49,700                                | 20.9%            |
|                                       | 30%                               | 41,600                                | 40,400                                | 28.2%            |
|                                       | 40%                               | 37,300                                | 26,200                                | 34.2%            |
|                                       | 50%                               | 35,100                                | 34,100                                | 39.2%            |
|                                       | 60%                               | 34,000                                | 33,000                                | 43.5%            |
|                                       | 70%                               | 33,500                                | 32,500                                | 47.2%            |
|                                       | 80%                               | 33,400                                | 32,400                                | 50.5%            |
|                                       | 90%                               | 33,500                                | 32,600                                | 53.4%            |
| 40% EO<br>60% EG                      | 10%                               | 159,710                               | 155,900                               | 0.5%             |
|                                       | 20%                               | 51,800                                | 50,200                                | 20.4%            |
|                                       | 30%                               | 41,700                                | 40,500                                | 28.0%            |
|                                       | 40%                               | 37,310                                | 36,200                                | 34.1%            |
|                                       | 50%                               | 35,200                                | 34,100                                | 39.1%            |
|                                       | 60%                               | 34,000                                | 33,000                                | 43.4%            |
|                                       | 70%                               | 33,500                                | 32,500                                | 47.2%            |
|                                       | 80%                               | 33,400                                | 32,400                                | 50.5%            |
|                                       | 90%                               | 33,500                                | 32,600                                | 53.4%            |
| 30% EO<br>70% EG                      | 10%                               | 165,200                               | 162,000                               | 0.01%            |
|                                       | 20%                               | 63,100                                | 61,300                                | 12.1%            |
|                                       | 30%                               | 42,100                                | 40,800                                | 27.4%            |
|                                       | 40%                               | 37,400                                | 36,300                                | 33.9%            |
|                                       | 50%                               | 35,200                                | 34,200                                | 39.0%            |
|                                       | 60%                               | 34,000                                | 33,000                                | 43.4%            |

| <b>Selectivity for EO/Selectivity for EG</b> | <b>Ethylene Single Pass Conversion %</b> | <b>Absorber 1 Water Requirement (kmol/h)</b> | <b>Absorber 2 Water Requirement (kmol/h)</b> | <b>Purge Percentage</b> |
|----------------------------------------------|------------------------------------------|----------------------------------------------|----------------------------------------------|-------------------------|
|                                              | 70%                                      | 33,500                                       | 32,510                                       | 47.1%                   |
|                                              | 80%                                      | 33,400                                       | 32,400                                       | 50.4%                   |
|                                              | 90%                                      | 33,500                                       | 32,510                                       | 53.3%                   |
| 20% EO<br>80% EG                             | 10%                                      | 163,500                                      | 161,300                                      | 0.01%                   |
|                                              | 20%                                      | 92,200                                       | 90,300                                       | 0.01%                   |
|                                              | 30%                                      | 55,500                                       | 54,100                                       | 9.90%                   |
|                                              | 40%                                      | 40,000                                       | 38,900                                       | 27.00%                  |
|                                              | 50%                                      | 35,700                                       | 34,600                                       | 36.90%                  |
|                                              | 60%                                      | 34,200                                       | 33,200                                       | 42.50%                  |
|                                              | 70%                                      | 33,510                                       | 32,600                                       | 46.70%                  |
|                                              | 80%                                      | 33,400                                       | 32,400                                       | 50.10%                  |
|                                              | 90%                                      | 33,500                                       | 32,500                                       | 53.30%                  |
|                                              | 10% EO<br>90% EG                         | 10%                                          | 161,900                                      | 160,500                 |
| 20%                                          |                                          | 90,600                                       | 89,600                                       | 0.01%                   |
| 30%                                          |                                          | 66,800                                       | 65,900                                       | 0.01%                   |
| 40%                                          |                                          | 54,900                                       | 54,000                                       | 0.01%                   |
| 50%                                          |                                          | 47,700                                       | 46,900                                       | 0.01%                   |
| 60%                                          |                                          | 41,900                                       | 41,100                                       | 3.80%                   |
| 70%                                          |                                          | 37,200                                       | 26,500                                       | 14.10%                  |
| 80%                                          |                                          | 34,900                                       | 34,200                                       | 22.50%                  |
| 90%                                          |                                          | 33,800                                       | 33,100                                       | 29.20%                  |



### S3.6 Theoretical Electrochemical Ethylene Epoxidation Process Model

**Table S13.** Summary of highest performing literature ethylene epoxidation reaction systems under theoretical single pass conversions. Bold and white cells indicate exceeding the top ethylene value, while grey cells indicate an NPV per kg<sub>ethylene</sub> below this value.

| System                       | Single Pass Conversion | First Quartile (NPV/kg <sub>ethylene</sub> ) | Median (NPV/kg <sub>ethylene</sub> ) | Third Quartile (NPV/kg <sub>ethylene</sub> ) |
|------------------------------|------------------------|----------------------------------------------|--------------------------------------|----------------------------------------------|
| <b>Ethylene Market Value</b> |                        | <b>\$0.83 - \$1.50</b>                       |                                      |                                              |
| <b>E1</b>                    | 90%                    | \$1.02                                       | <b>\$3.22</b>                        | <b>\$5.17</b>                                |
|                              | 80%                    | -\$0.19                                      | <b>\$1.91</b>                        | <b>\$3.83</b>                                |
|                              | 70%                    | -\$1.46                                      | \$0.55                               | <b>\$2.43</b>                                |
| <b>E2</b>                    | 90%                    | -\$0.09                                      | <b>\$2.08</b>                        | <b>\$4.03</b>                                |
|                              | 80%                    | -\$1.55                                      | \$0.50                               | <b>\$2.40</b>                                |
|                              | 70%                    | -\$3.08                                      | -\$1.15                              | \$0.71                                       |
| <b>E3</b>                    | <b>90%</b>             | <b>\$3.74</b>                                | <b>\$6.65</b>                        | <b>\$9.30</b>                                |
|                              | <b>80%</b>             | <b>\$1.96</b>                                | <b>\$4.64</b>                        | <b>\$7.05</b>                                |
|                              | 70%                    | \$0.14                                       | <b>\$2.60</b>                        | <b>\$4.81</b>                                |
| <b>E4</b>                    | 90%                    | -\$6.14                                      | -\$3.52                              | -\$1.10                                      |

### S3.7 System E3 Sensitivity to Applied Voltage and Electricity Price

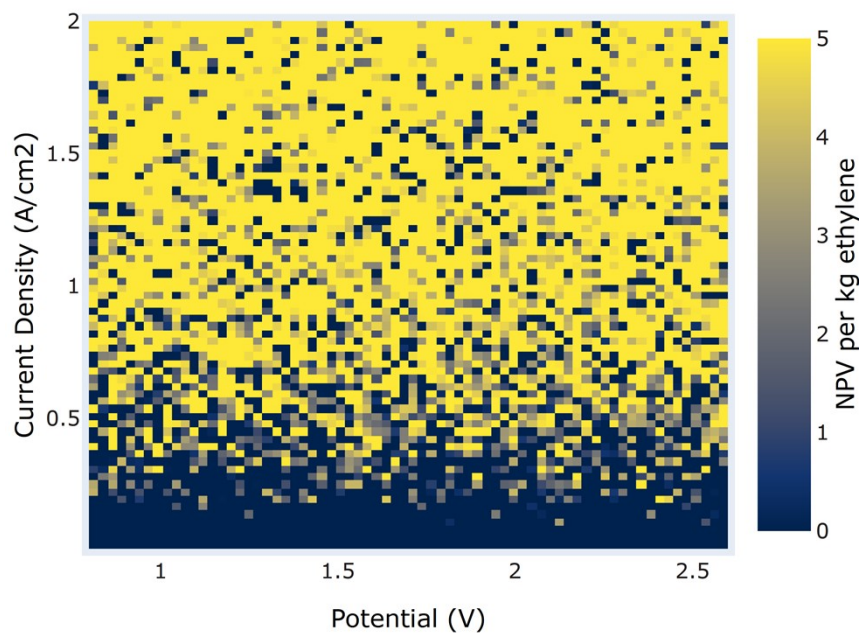

**Figure S8.** NPV per kg of ethylene for System E3 carbon selectivities against applied voltage and current density at observed literature single pass conversion and modeled single pass conversions. Uncertainty is incorporated in the heat map by utilizing data from all 800,000 simulations and taking the mean value in each pixel to signify the region in which, under uncertainty, the electrochemical process is economically feasible.

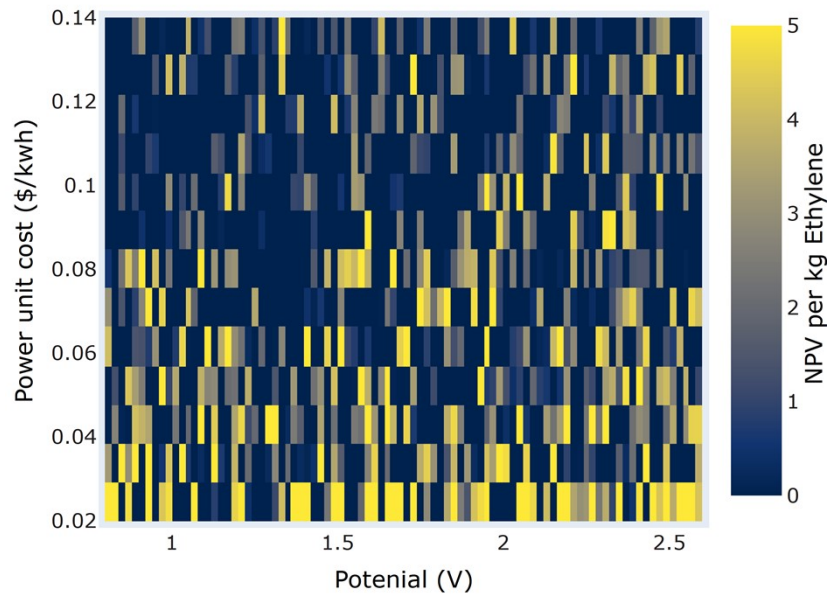

**Figure S9.** NPV per kg of ethylene for System E3 carbon selectivities against applied voltage and electricity price at observed literature single pass conversion and modeled single pass conversions. Uncertainty is incorporated in the heat map by utilizing data from all 800,000 simulations and taking the mean value in each pixel to signify the region in which, under uncertainty, the electrochemical process is economically feasible.

## S4. Gaseous Electrochemical Propylene Epoxidation Process Models and Additional Results Summaries

### S4.1 System P1, P2, and P3 Electrochemical Propylene Epoxidation Process Model

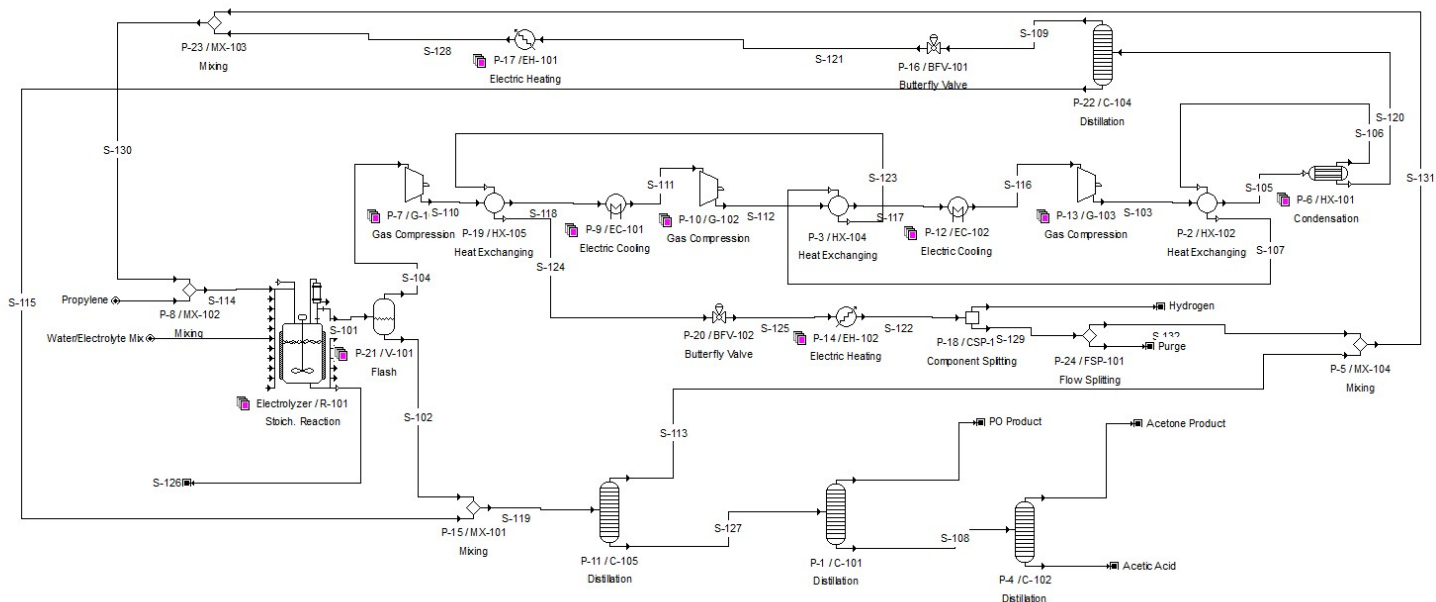

**Figure S10.** Gaseous propylene electrooxidation process model flow diagram in for literature System P1, P2, and P3.

The gaseous electrochemical propylene electrooxidation process model for System P1, P2, and P3 assumes a 181 ktonnes per year propylene feed rate at STP. In this model, a premixed water and electrolyte mixture at STP with a 0.1 M phosphate buffer (modeled as  $K_2HPO_4$ ) concentration is mixed with a previously combined fresh propylene stream and recycled propylene stream. This stream is then fed to a stoichiometric reactor assuming carbon selectivities as stated in Table S5 and varied single pass conversion rates as shown in Table S14. The three reactions in this case utilize the same model with modification to the reactor to accommodate the respective selectivities for each System, P1, P2, or P3. A stoichiometric volume of hydrogen is assumed to be produced in this reaction to mimic that of an electrolyzer.

The reaction is carried out at STP to mimic the conditions of an electrochemical process. To model the reactor like an electrolyzer, the reactor is set to split the streams with all cathode side products, unreacted propylene, hydrogen, and oxygen leaving the top of the reactor and the water and electrolyte (anode side) leaving the bottom of the reactor. The anode side stream recycle is not shown in the figure; however, the cost for this stream is set to zero to account for the potential to recycle the stream.

The cathode side components leaving the reactor are propylene, PO, acetic acid, acetone, H<sub>2</sub>, and O<sub>2</sub>. As SuperPro Designer does not have a built in electrolyzer unit operation, we determined energy requirements, maintenance costs, and capital cost of the reactor with an external model based on the DOE H2A model.<sup>67</sup>

The cathode side stream from the reactor is sent to a flash vessel at 25 °C and 1 bar to recover as much of the liquid stream as possible modeled by Henry's Law in the process design software.

The gaseous products from the reactor are compressed via a three-stage compressor system (80% efficiency) outlet to varied pressures depending on the single pass conversion outlined in Table S14 to maximize the recovery of the unreacted propylene with interstage electric cooling, and interstage shell and tube exchangers coming from the condenser outlet. The compressed gas stream then passes through a condenser set to -10 °C cooled by CaCl<sub>2</sub> brine to liquify the propylene, and residual PO in the stream that is then separated in a distillation column to separate the propylene in the distillate and send the PO rich stream bottoms to the liquids recovery section. The pressure in the liquid propylene stream is lowered to 1 atm through a valve and reheated/regassified by an electric heater to 25 °C and is combined with the fresh propylene stream. The uncondensed gases from the condenser including some propylene, H<sub>2</sub>, and O<sub>2</sub> are reheated through the shell sides of the heat exchangers in the compression system. The pressure

is lowered to 30 bar and the gas is heated to 200 °C by an electric heater and then enters a component splitter set to mimic a hydrogen separating membrane due to the lack of such a unit operation in SuperPro designer. The component splitter is assumed to recover 99% of the hydrogen as reported by available products from Air Liquide <sup>69</sup>. The remaining gas stream containing unrecovered propylene and H<sub>2</sub> and O<sub>2</sub> is then purged.

This liquid stream from the first separator is passed to a distillation column set to 20 bar designed to recover 99.9% of the propylene as the distillate, as the VLE leads to some carry over of the unreacted propylene into the liquid separation portion of the facility. The bottoms stream of the distillation column contains PO, acetic acid, and acetone. The bottoms stream passes to an atmospheric distillation column designed to recover 99.9% of the PO. The bottoms streams containing acetic acid and acetone then passes to a third atmospheric distillation column to separate the two products.

**Table S14.** Recycle system compression train setting at the condenser for the process model for Systems P1, P2, and P3.

| <b>Propylene Single Pass Conversion %</b> | <b>System P1 Purge Percentage</b> | <b>System P2 Purge Percentage</b> | <b>System P3 Purge Percentage</b> |
|-------------------------------------------|-----------------------------------|-----------------------------------|-----------------------------------|
| 10%                                       | 88.6%                             | 89.9%                             | 91.8%                             |
| 11.4%                                     | 89.9%                             | N/A                               | N/A                               |
| 12.4%                                     | N/A                               | N/A                               | 93.1%                             |
| 14.1%                                     | N/A                               | 92.6%                             | N/A                               |
| 20%                                       | 94.0%                             | 94.7%                             | 95.7%                             |
| 30%                                       | 95.9%                             | 96.4%                             | 97.1%                             |
| 40%                                       | 96.9%                             | 97.3%                             | 97.9%                             |
| 50%                                       | 97.5%                             | 97.8%                             | 98.3%                             |
| 60%                                       | 98.0%                             | 98.2%                             | 98.6%                             |
| 70%                                       | 98.2%                             | 98.5%                             | 98.8%                             |
| 80%                                       | 98.5%                             | 98.7%                             | 98.9%                             |
| 90%                                       | 98.6%                             | 98.8%                             | 99.0%                             |

| <b>Propylene Single Pass Conversion %</b> | <b>System P1 Pressure at the Condenser (bar)</b> | <b>System P2 Pressure at the Condenser (bar)</b> | <b>System P3 Pressure at the Condenser (bar)</b> |
|-------------------------------------------|--------------------------------------------------|--------------------------------------------------|--------------------------------------------------|
| 10%                                       | 30                                               | 30                                               | 40                                               |
| 11.4%                                     | 35                                               | N/A                                              | N/A                                              |
| 12.4%                                     | N/A                                              | N/A                                              | 43                                               |
| 14.1%                                     | N/A                                              | 37                                               | N/A                                              |
| 20%                                       | 50                                               | 50                                               | 65                                               |
| 30%                                       | 75                                               | 75                                               | 90                                               |
| 40%                                       | 100                                              | 100                                              | 115                                              |
| 50%                                       | 125                                              | 125                                              | 140                                              |
| 60%                                       | 150                                              | 150                                              | 170                                              |
| 70%                                       | 180                                              | 180                                              | 195                                              |
| 80%                                       | 210                                              | 210                                              | 210                                              |
| 90%                                       | 240                                              | 240                                              | 245                                              |

## S4.2 System P4 Electrochemical Propylene Epoxidation Process Model

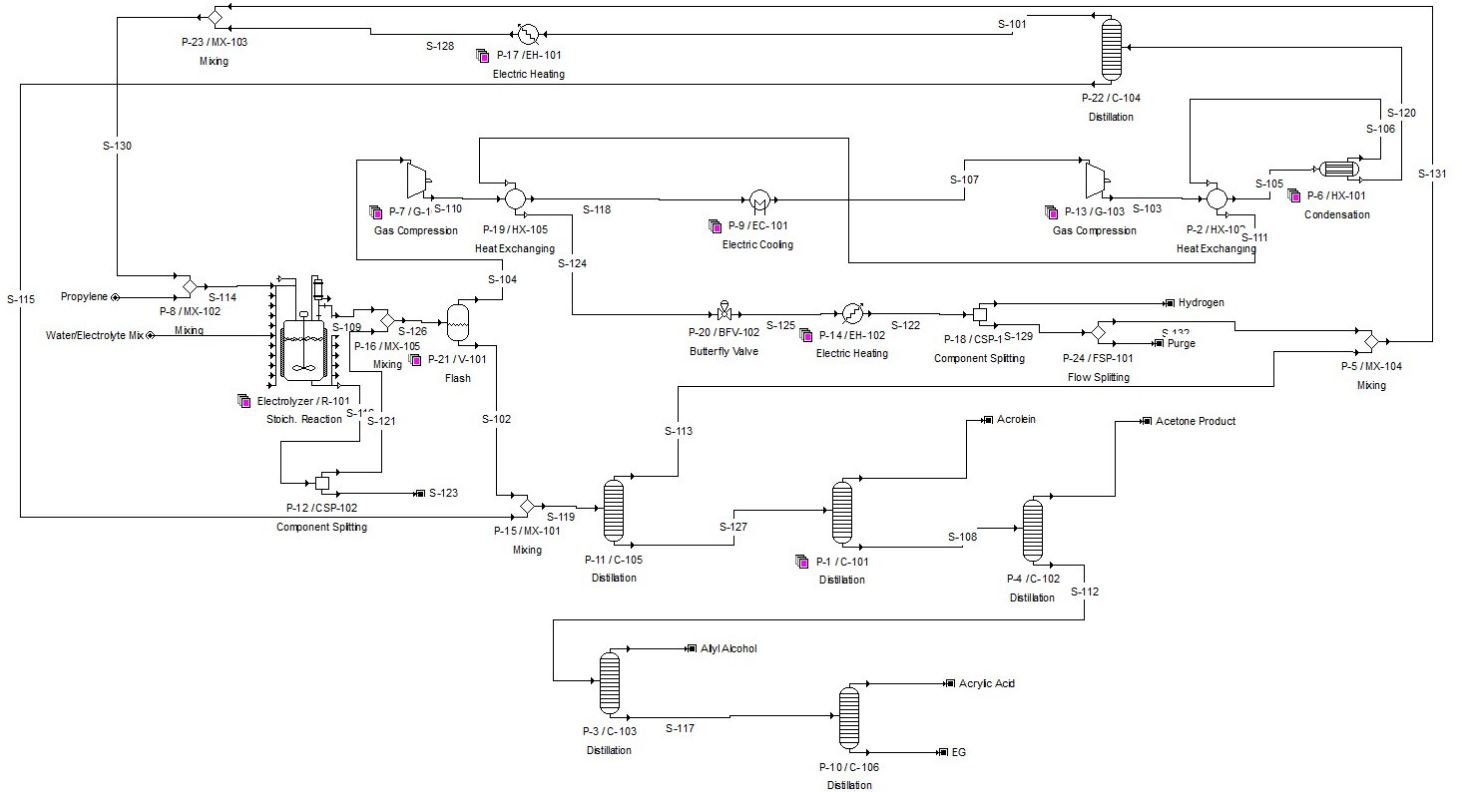

**Figure S11.** Gaseous propylene electrooxidation process model flow diagram for literature System P4.

The gaseous propylene electrooxidation process model for System P4 assumes a 181 ktonnes propylene feed rate at STP. In this model, a premixed water and electrolyte mixture at STP with a 0.1 M perchloric acid concentration is mixed with a previously combined fresh propylene stream and recycled propylene stream. This stream is then fed to a stoichiometric reactor assuming carbon selectivities as stated in Table S5 and varied single pass conversion rates as shown in Table S15. A stoichiometric volume of hydrogen is assumed to be produced in this reaction to mimic that of an electrolyzer. The reaction is carried out at STP to mimic the conditions of an electrochemical process. To model the reactor like an electrolyzer, the reactor is set to split the streams with all cathode side products, unreacted propylene, hydrogen, and oxygen leaving the top of the reactor and the water and electrolyte (anode side) leaving the



bottom of the reactor. The anode side stream recycle is not shown in the figure; however, the cost for this stream is set to zero to account for the potential to recycle the stream.

The cathode side components leaving the reactor are propylene, PG, acrolein, acetone, allyl alcohol, acrylic acid, H<sub>2</sub>, and O<sub>2</sub>. As SuperPro Designer does not have a built in electrolyzer unit operation, we determined energy requirements, maintenance costs, and capital cost of the reactor with an external model based on the DOE H2A model.<sup>67</sup>

The cathode side stream from the reactor is sent to a flash vessel at 25 °C and 1 bar to recover as much of the liquid stream as possible modeled by Henry's Law in the process design software.

The gaseous products from the reactor are compressed via a compressor system (80% efficiency) outlet to varied pressures depending on the single pass conversion outlined in Table S15 to maximize the recovery of the unreacted propylene with interstage electric cooling, and interstage shell and tube exchangers coming from the condenser outlet. The compressed gas stream then passes through a condenser set to -10 °C cooled by CaCl<sub>2</sub> brine to liquify the propylene, and residual products in the stream that is then separated in a distillation column to separate the propylene in the distillate and send the liquid stream bottoms to the liquids recovery section. The pressure in the liquid propylene stream is lowered to 1 atm through a valve and reheated/regassified by an electric heater to 25 °C and is combined with the fresh propylene stream. The uncondensed gases from the condenser including some propylene, H<sub>2</sub> and O<sub>2</sub> are reheated through the shell sides of the heat exchangers in the compression system. The pressure is lowered to 30 bar and the gas is heated to 200 °C by an electric heater and then enters a component splitter set to mimic a hydrogen separating membrane due to the lack of such a unit operation in SuperPro designer. The component splitter is assumed to recover 99% of the

hydrogen as reported by available products from Air Liquide <sup>69</sup>. The remaining gas stream containing unrecovered propylene and H<sub>2</sub> and O<sub>2</sub> is then purged.

This liquid stream from the first separator is passed to a distillation column set to 20 bar designed to recover 99.9% of the propylene as the distillate, as the VLE leads to some carry over of the unreacted propylene into the liquid separation portion of the facility. The bottoms stream of the distillation column is then passed through a series of distillation columns to individually recover each of the PG, acrolein, acetone, allyl alcohol, acrylic acid products.

**Table S15.** Recycle system compression train setting at the condenser for the process model for System P4.

| <b>Propylene Single Pass Conversion %</b> | <b>System 4 Purge Percentage</b> | <b>System P4 Pressure at the Condenser (bar)</b> |
|-------------------------------------------|----------------------------------|--------------------------------------------------|
| 0.01%                                     | 51.0%                            | 10                                               |
| 10%                                       | 66.0%                            | 20                                               |
| 20%                                       | 79.5%                            | 40                                               |
| 30%                                       | 85.5%                            | 60                                               |
| 40%                                       | 88.7%                            | 80                                               |
| 50%                                       | 90.8%                            | 100                                              |
| 60%                                       | 92.2%                            | 120                                              |
| 70%                                       | 93.2%                            | 150                                              |
| 80%                                       | 94.1%                            | 180                                              |
| 90%                                       | 94.7%                            | 210                                              |

### S4.3 Theoretical Electrochemical Propylene Epoxidation Process Model

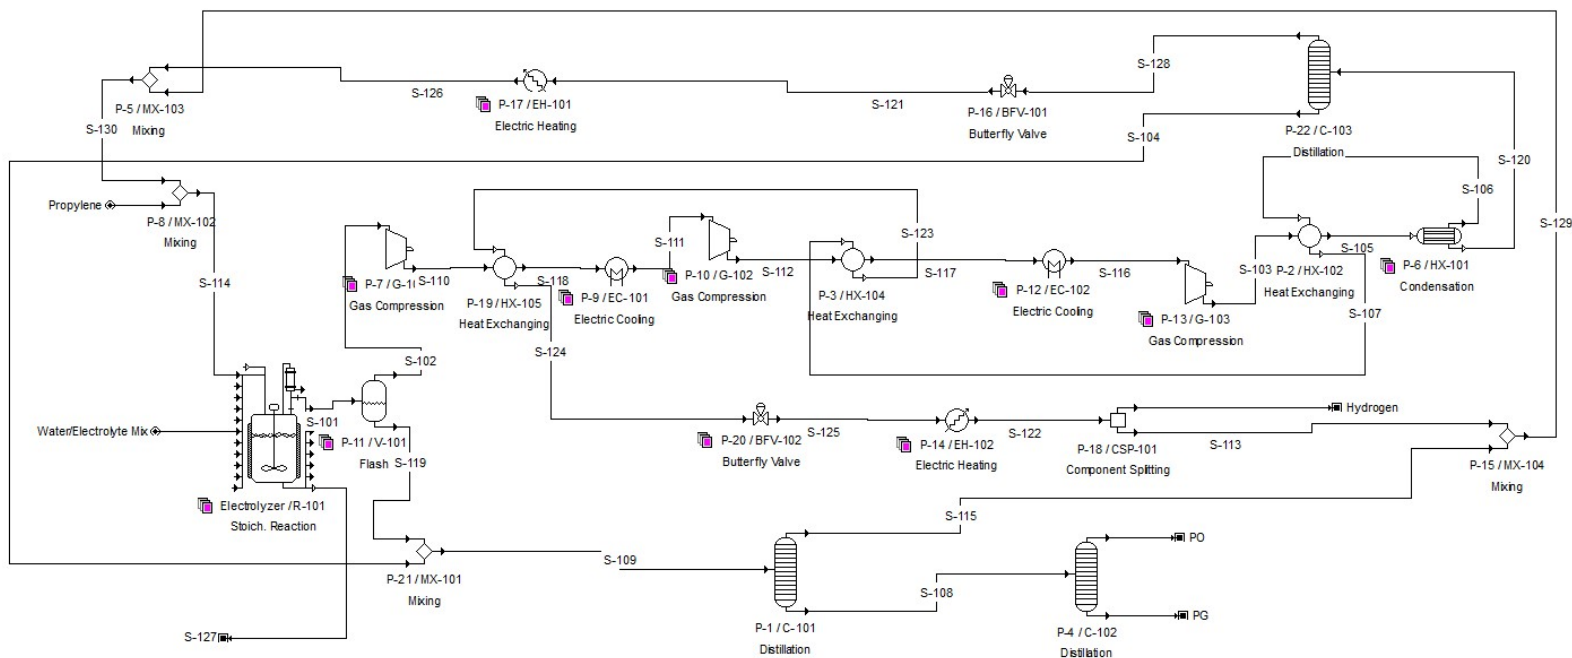

**Figure S12.** Gaseous propylene electrooxidation process model flow diagram for theoretical reactions with varied single pass conversions and selectivities for PO versus PG.

The gaseous propylene electrooxidation process model for theoretical reactions with varied single pass conversions and selectivities for PO versus PG assumes a 181 ktonnes propylene feed rate at STP. In this model, a premixed water and electrolyte mixture at STP with a 0.1 M phosphate buffer (modeled as  $K_2HPO_4$ ) concentration is mixed with a previously combined fresh propylene stream and recycled propylene stream. This stream is then fed to a stoichiometric reactor assuming varied carbon selectivities for PO and PG with no other side products formed at varied single pass conversion rates as shown in Table S16. A stoichiometric volume of hydrogen is assumed to be produced in this reaction to mimic that of an electrolyzer. The reaction is carried out at STP to mimic the conditions of an electrochemical process. To model the reactor like an electrolyzer, the reactor is set to split the streams with all cathode side products, unreacted propylene, hydrogen, and oxygen leaving the top of the reactor and the water and

electrolyte (anode side) leaving the bottom of the reactor. The anode side stream recycle is not shown in the figure; however, the cost for this stream is set to zero to account for the potential to recycle the stream.

The cathode side components leaving the reactor are propylene, PO, PG, H<sub>2</sub>, and O<sub>2</sub>. As SuperPro Designer does not have a built in electrolyzer unit operation, we determined energy requirements, maintenance costs, and capital cost of the reactor with an external model based on the DOE H2A model.<sup>67</sup>

The cathode side stream from the reactor is sent to a flash vessel at 25 °C and 1 bar to recover as much of the liquid stream as possible modeled by Henry's Law in the process design software.

The gaseous products from the reactor are compressed via a compressor system (80% efficiency) outlet to varied pressures depending on the single pass conversion outlined in Table S16 to maximize the recovery of the unreacted propylene with interstage electric cooling, and interstage shell and tube exchangers coming from the condenser outlet. The compressed gas stream then passes through a condenser set to -10 °C cooled by CaCl<sub>2</sub> brine to liquify the propylene, and residual products in the stream that is then separated in a distillation column to separate the propylene in the distillate and send the liquid stream bottoms to the liquids recovery section. The pressure in the liquid propylene stream is lowered to 1 atm through a valve and reheated/regassified by an electric heater to 25 °C and is combined with the fresh propylene stream. The uncondensed gases from the condenser including some propylene, H<sub>2</sub>, and O<sub>2</sub> are reheated through the shell sides of the heat exchangers in the compression system. The pressure is lowered to 30 bar and the gas is heated to 200 °C by an electric heater and then enters a component splitter set to mimic a hydrogen separating membrane due to the lack of such a unit operation in SuperPro designer. The component splitter is assumed to recover 99% of the

hydrogen as reported by available products from Air Liquide <sup>69</sup>. The remaining gas stream containing unrecovered propylene and H<sub>2</sub> and O<sub>2</sub> is then purged.

This liquid stream from the first separator is passed to a distillation column set to 20 bar designed to recover 99.9% of the propylene as the distillate, as the VLE leads to some carry over of the unreacted propylene into the liquid separation portion of the facility. The bottoms stream of the distillation column then separates and recovers the PO as the distillate and PG as the bottoms stream.

**Table S16.** Recycle system compression train setting at the condenser for the process model for theoretical reactions with varied single pass conversions and selectivities for PO versus PG.

| Selectivity for PO/Selectivity for PG | Propylene Single Pass Conversion % | Pressure at the Condenser (bar) |
|---------------------------------------|------------------------------------|---------------------------------|
| 100% PO<br>0% PG                      | 10%                                | 15                              |
|                                       | 20%                                | 25                              |
|                                       | 30%                                | 40                              |
|                                       | 40%                                | 55                              |
|                                       | 50%                                | 65                              |
|                                       | 60%                                | 75                              |
|                                       | 70%                                | 85                              |
|                                       | 80%                                | 95                              |
|                                       | 90%                                | 105                             |
| 90% PO<br>10% PG                      | 10%                                | 15                              |
|                                       | 20%                                | 25                              |
|                                       | 30%                                | 40                              |
|                                       | 40%                                | 55                              |
|                                       | 50%                                | 70                              |
|                                       | 60%                                | 85                              |
|                                       | 70%                                | 100                             |
|                                       | 80%                                | 110                             |
|                                       | 90%                                | 165                             |
| 80% PO<br>20% PG                      | 10%                                | 15                              |
|                                       | 20%                                | 25                              |
|                                       | 30%                                | 40                              |
|                                       | 40%                                | 55                              |
|                                       | 50%                                | 70                              |
|                                       | 60%                                | 90                              |
|                                       | 70%                                | 110                             |
|                                       | 80%                                | 135                             |
|                                       | 90%                                | 165                             |
| 70% PO<br>30% PG                      | 10%                                | 15                              |
|                                       | 20%                                | 25                              |
|                                       | 30%                                | 40                              |
|                                       | 40%                                | 55                              |
|                                       | 50%                                | 70                              |
|                                       | 60%                                | 90                              |
|                                       | 70%                                | 110                             |
|                                       | 80%                                | 135                             |
|                                       | 90%                                | 165                             |
| 60% PO                                | 10%                                | 15                              |

| <b>Selectivity for PO/Selectivity for PG</b> | <b>Propylene Single Pass Conversion %</b> | <b>Pressure at the Condenser (bar)</b> |
|----------------------------------------------|-------------------------------------------|----------------------------------------|
| 40% PG                                       | 20%                                       | 25                                     |
|                                              | 30%                                       | 40                                     |
|                                              | 40%                                       | 65                                     |
|                                              | 50%                                       | 90                                     |
|                                              | 60%                                       | 115                                    |
|                                              | 70%                                       | 150                                    |
|                                              | 80%                                       | 190                                    |
|                                              | 90%                                       | 230                                    |
| 50% PO<br>50% PG                             | 10%                                       | 15                                     |
|                                              | 20%                                       | 25                                     |
|                                              | 30%                                       | 40                                     |
|                                              | 40%                                       | 65                                     |
|                                              | 50%                                       | 100                                    |
|                                              | 60%                                       | 135                                    |
|                                              | 70%                                       | 175                                    |
|                                              | 80%                                       | 275                                    |
|                                              | 90%                                       | 300                                    |
| 40% PO<br>60% PG                             | 10%                                       | 15                                     |
|                                              | 20%                                       | 25                                     |
|                                              | 30%                                       | 40                                     |
|                                              | 40%                                       | 65                                     |
|                                              | 50%                                       | 100                                    |
|                                              | 60%                                       | 130                                    |
|                                              | 70%                                       | 175                                    |
|                                              | 80%                                       | 275                                    |
|                                              | 90%                                       | 475                                    |
| 30% PO<br>70% PG                             | 10%                                       | 15                                     |
|                                              | 20%                                       | 25                                     |
|                                              | 30%                                       | 40                                     |
|                                              | 40%                                       | 65                                     |
|                                              | 50%                                       | 100                                    |
|                                              | 60%                                       | 125                                    |
|                                              | 70%                                       | 175                                    |
|                                              | 80%                                       | 275                                    |
|                                              | 90%                                       | 475                                    |
| 20% PO<br>80% PG                             | 10%                                       | 15                                     |
|                                              | 20%                                       | 25                                     |
|                                              | 30%                                       | 40                                     |
|                                              | 40%                                       | 65                                     |
|                                              | 50%                                       | 100                                    |
|                                              | 60%                                       | 125                                    |



| <b>Selectivity for PO/Selectivity for PG</b> | <b>Propylene Single Pass Conversion %</b> | <b>Pressure at the Condenser (bar)</b> |
|----------------------------------------------|-------------------------------------------|----------------------------------------|
|                                              | 70%                                       | 175                                    |
|                                              | 80%                                       | 275                                    |
|                                              | 90%                                       | 475                                    |
| 10% PO<br>90% PG                             | 10%                                       | 15                                     |
|                                              | 20%                                       | 25                                     |
|                                              | 30%                                       | 40                                     |
|                                              | 40%                                       | 65                                     |
|                                              | 50%                                       | 100                                    |
|                                              | 60%                                       | 125                                    |
|                                              | 70%                                       | 175                                    |
|                                              | 80%                                       | 275                                    |
|                                              | 90%                                       | 475                                    |

#### S4.4 System P2 Sensitivity to Applied Voltage and Electricity Price

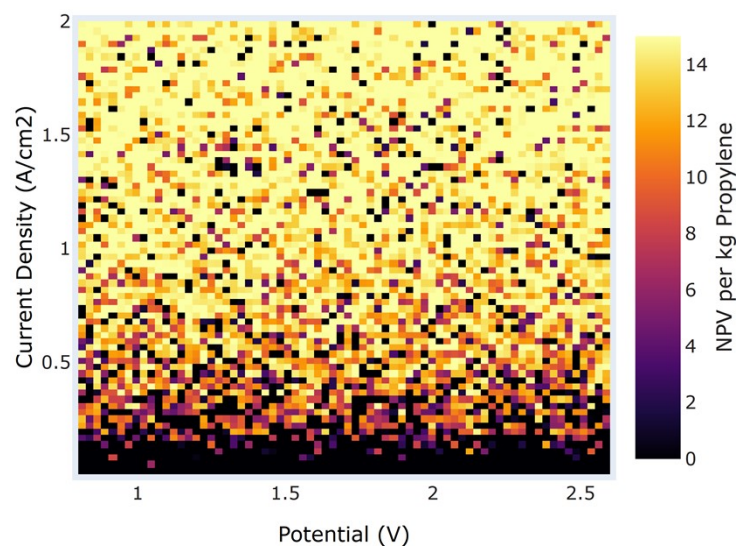

**Figure S13.** NPV per kg of propylene for System P2 carbon selectivities against applied voltage and current density at 90% single pass conversion. Uncertainty is incorporated in the heat map by utilizing data from all 800,000 simulations and taking the mean value in each pixel to signify the region in which, under uncertainty, the electrochemical process is economically feasible

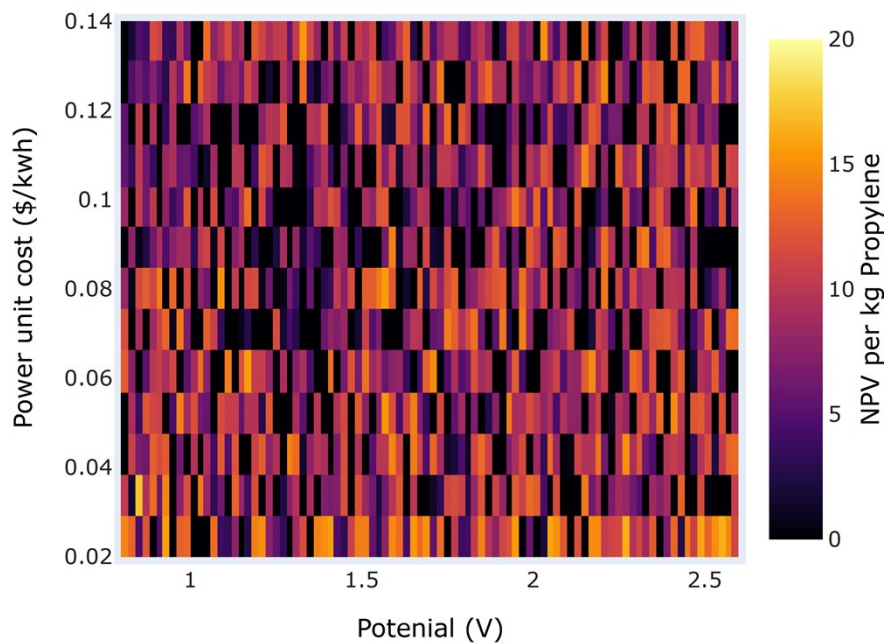

**Figure S14.** NPV per kg of propylene for System P2 carbon selectivities against applied voltage and electricity price at 90% single pass conversion. Uncertainty is incorporated in the heat map by utilizing data from all 800,000 simulations and taking the mean value in each pixel to signify the region in which, under uncertainty, the electrochemical process is economically feasible.

## S5. Uncertainty Analysis Parameters

### S5.1 Ethylene Processes Uncertainty Analysis Parameters

**Table S17.** Parameters varied in the economic model’s uncertainty analysis and their respective

values for the gaseous ethylene electrooxidation models.

| Model Parameter                                             | Value Range                                                                  | Distribution Type | Source                                                                                                                                                                 |
|-------------------------------------------------------------|------------------------------------------------------------------------------|-------------------|------------------------------------------------------------------------------------------------------------------------------------------------------------------------|
| Faradaic Efficiency                                         | 0.01-99.99%                                                                  | Uniform           | Assumed range                                                                                                                                                          |
| Potential (V)                                               | 0.8–2.6                                                                      | Uniform           | Assumed range                                                                                                                                                          |
| Current Density (A/cm <sup>2</sup> )                        | 0.001-2.000                                                                  | Uniform           | Assumed range                                                                                                                                                          |
| Electrolyzer cost per m <sup>2</sup>                        | \$5,000-\$20,0000                                                            | Uniform           | 67                                                                                                                                                                     |
| Electrolyzer Installation Costs Percentage of Capital Costs | 8%-16%<br><br>Note: 10% is the installation factor utilized in the H2A Model | Uniform           | 67                                                                                                                                                                     |
| Labor Rate (\$/hr)                                          | \$55.20-\$82.80                                                              | Uniform           | +/- 20% from default SuperPro Designer base value                                                                                                                      |
| Ethylene Cost (\$/kg)                                       | \$0.83-\$1.50                                                                | Uniform           | 70                                                                                                                                                                     |
| Water Cost (\$/kgal)                                        | Average: \$3.95<br>STD: \$1.10                                               | Normal            | 71                                                                                                                                                                     |
| Power unit cost (\$/kWh)                                    | \$0.02-\$0.14                                                                | Uniform           | +/- 20% from default SuperPro Designer base value                                                                                                                      |
| Steam Unit Cost (\$/MT)                                     | \$10-\$14                                                                    | Uniform           | +/- 20% from default SuperPro Designer base value                                                                                                                      |
| HP Steam Unit Cost (\$/MT)                                  | \$16-\$24                                                                    | Uniform           | +/- 20% from default SuperPro Designer base value                                                                                                                      |
| Cooling Water Unit Cost (\$/MT)                             | \$0.02-\$0.10                                                                | Uniform           | +/- 20% from default SuperPro Designer base value                                                                                                                      |
| Chilled Water Costs (\$/MT)                                 | \$0.30-\$0.49                                                                | Uniform           | +/- 20% from default SuperPro Designer base value                                                                                                                      |
| Hot water costs (\$/Mt)                                     | \$0.04-\$0.06                                                                | Uniform           | +/- \$0.01 from default SuperPro Designer base value                                                                                                                   |
| EO Sale Price (\$/kg)                                       | \$1.62-\$1.93                                                                | Uniform           | 72                                                                                                                                                                     |
| H2 Sale Price (\$/kg)                                       | \$1.00-\$2.50                                                                | Uniform           | 73                                                                                                                                                                     |
| EG Sale Price (\$/kg)                                       | \$0.83-\$1.00                                                                | Uniform           | 74                                                                                                                                                                     |
| GA Sale Price (\$/kg)                                       | \$0.77-\$0.93                                                                | Uniform           | +/- 10% from <sup>75</sup>                                                                                                                                             |
| Acetaldehyde Sale Price (\$/kg)                             | \$0.59-\$2.40                                                                | Uniform           | 76                                                                                                                                                                     |
| Formic Acid sale price (\$/kg)                              | \$0.80-\$1.20                                                                | Uniform           | 77                                                                                                                                                                     |
| Nominal Tax Rate                                            | 25% average                                                                  | Normal            | 78                                                                                                                                                                     |
| Electrolyzer Replacement Cost % of CAPEX                    | 10%-35%                                                                      | Uniform           | 67<br><br>Note: 15% is used in the H2A model for PEM electrolyzers. A potentially higher bound is studied here to account for application of a less certain technology |
| Lifetime of Electrolyzer (yrs)                              | 1 month – 15 years                                                           | Uniform           | Assumed range                                                                                                                                                          |

## S5.2 Propylene Processes Uncertainty Analysis Parameters

**Table S18.** Parameters varied in the economic model's uncertainty analysis and their respective values for the gaseous propylene electrooxidation models.

| Model Parameter                                             | Value Range                                                              | Distribution Type | Source                                                                                                                                                                 |
|-------------------------------------------------------------|--------------------------------------------------------------------------|-------------------|------------------------------------------------------------------------------------------------------------------------------------------------------------------------|
| Faradaic Efficiency                                         | 0.01-99.99%                                                              | Uniform           | Assumed range                                                                                                                                                          |
| Potential (V)                                               | 0.8–2.6                                                                  | Uniform           | Assumed range                                                                                                                                                          |
| Current Density (A/cm <sup>2</sup> )                        | 0.001-2.000                                                              | Uniform           | Assumed rang                                                                                                                                                           |
| Electrolyzer cost per m <sup>2</sup>                        | \$5,000-\$20,0000                                                        | Uniform           | 67                                                                                                                                                                     |
| Electrolyzer Installation Costs Percentage of Capital Costs | 8%-16%<br>Note: 10% is the installation factor utilized in the H2A Model | Uniform           | 67                                                                                                                                                                     |
| Labor Rate (\$/hr)                                          | \$55.20-\$82.80                                                          | Uniform           | +/- 20% from default SuperPro Designer base value                                                                                                                      |
| Propylene Cost (\$/kg)                                      | \$0.52-\$1.64                                                            | Uniform           | 79 79                                                                                                                                                                  |
| Water Cost (\$/kgal)                                        | Average: \$3.95<br>STD: \$1.10                                           | Normal            | 71                                                                                                                                                                     |
| Power unit cost (\$/kWh)                                    | \$0.02-\$0.14                                                            | Uniform           | +/- 20% from default SuperPro Designer base value                                                                                                                      |
| Steam Unit Cost (\$/MT)                                     | \$10-\$14                                                                | Uniform           | +/- 20% from default SuperPro Designer base value                                                                                                                      |
| HP Steam Unit Cost (\$/MT)                                  | \$16-\$24                                                                | Uniform           | +/- 20% from default SuperPro Designer base value                                                                                                                      |
| Cooling Water Unit Cost (\$/MT)                             | \$0.02-\$0.10                                                            | Uniform           | +/- 20% from default SuperPro Designer base value                                                                                                                      |
| CaCl <sub>2</sub> Brine Unit Cost (\$/MT)                   | \$0.20-\$0.30                                                            | Uniform           | +/- 20% from default SuperPro Designer base value                                                                                                                      |
| Hot Water Unit Cost                                         | \$0.04-\$0.06                                                            | Uniform           | +/- \$0.01 from default SuperPro Designer base value                                                                                                                   |
| PO Sale Price (\$/kg)                                       | \$2.60-\$3.72                                                            | Uniform           | 80                                                                                                                                                                     |
| H <sub>2</sub> Sale Price (\$/kg)                           | \$1.00-\$2.50                                                            | Uniform           | 73                                                                                                                                                                     |
| PG Sale Price (\$/kg)                                       | \$1.28-\$3.14                                                            | Uniform           | 81                                                                                                                                                                     |
| Acetone Sale Price (\$/kg)                                  | \$0.79-2.03                                                              | Uniform           | 82                                                                                                                                                                     |
| Acetic Acid Sale Price (\$/kg)                              | \$0.66-\$0.90                                                            | Uniform           | 83                                                                                                                                                                     |
| Acrolein Sale Price (\$/kg)                                 | \$1.41-\$2.80                                                            | Uniform           | 84                                                                                                                                                                     |
| Allyl Alcohol Sale Price (\$/kg)                            | \$2.20-\$3.20                                                            | Uniform           | 85                                                                                                                                                                     |
| Acrylic Acid Sale Price                                     | \$0.99-\$2.23                                                            | Uniform           | 86                                                                                                                                                                     |
| Nominal Tax Rate                                            | 25% average                                                              | Normal            | 78                                                                                                                                                                     |
| Electrolyzer Replacement Cost % of CAPEX                    | 10%-35%                                                                  | Uniform           | 67<br><br>Note: 15% is used in the H2A model for PEM electrolyzers. A potentially higher bound is studied here to account for application of a less certain technology |
| Lifetime of Electrolyzer (yrs)                              | 1 month – 15 years                                                       | Uniform           | Assumed range                                                                                                                                                          |

## S6. References

- (1) Lum, Y.; Huang, J. E.; Wang, Z.; Luo, M.; Nam, D.-H.; Leow, W. R.; Chen, B.; Wicks, J.; Li, Y. C.; Wang, Y.; Dinh, C.-T.; Li, J.; Zhuang, T.-T.; Li, F.; Sham, T.-K.; Sinton, D.; Sargent, E. H. Tuning OH Binding Energy Enables Selective Electrochemical Oxidation of Ethylene to Ethylene Glycol. *Nat. Catal.* **2020**, *3* (1), 14–22. <https://doi.org/10.1038/s41929-019-0386-4>.
- (2) Ke, J.; Zhao, J.; Chi, M.; Wang, M.; Kong, X.; Chang, Q.; Zhou, W.; Long, C.; Zeng, J.; Geng, Z. Facet-Dependent Electrooxidation of Propylene into Propylene Oxide over Ag<sub>3</sub>PO<sub>4</sub> Crystals. *Nat. Commun.* **2022**, *13* (1), 932. <https://doi.org/10.1038/s41467-022-28516-0>.
- (3) Winiwarter, A.; Silvioli, L.; Scott, S. B.; Enemark-Rasmussen, K.; Sariç, M.; Trimarco, D. B.; Vesborg, P. C. K.; Moses, P. G.; Stephens, I. E. L.; Seger, B.; Rossmeisl, J.; Chorkendorff, I. Towards an Atomistic Understanding of Electrocatalytic Partial Hydrocarbon Oxidation: Propene on Palladium. *Energy Environ. Sci.* **2019**, *12* (3), 1055–1067. <https://doi.org/10.1039/C8EE03426E>.
- (4) Torres, A. *BASF Total's Port Arthur cracker in Texas remains shut for maintenance: sources*. S&P Global Commodity Insights. <https://www.spglobal.com/commodityinsights/en/market-insights/latest-news/petrochemicals/081120-basf-totals-port-arthur-cracker-in-texas-remains-shut-for-maintenance-sources> (accessed 2023-08-28).
- (5) Hays, K.; Petras, K. *New Baystar cracker in Texas starting up: sources*. S&P Global Commodity Insights. <https://www.spglobal.com/commodityinsights/en/market-insights/latest-news/petrochemicals/061121-new-baystar-cracker-in-texas-starting-up-sources> (accessed 2023-08-28).
- (6) Total. *Our Activities in the United States*; Total, 2021. [https://corporate.totalenergies.us/system/files/atoms/files/total\\_country\\_brochure\\_2021.pdf](https://corporate.totalenergies.us/system/files/atoms/files/total_country_brochure_2021.pdf).
- (7) Tullo, A. H. Chevron-Phillips-Fires-New-Cracker. *Chemical & Engineering News*. Volume 96, Issue 12. March 19, 2018. <https://cen.acs.org/articles/96/i12/Chevron-Phillips-fires-new-cracker.html> (accessed 2023-08-28).
- (8) Pulsinelli, O. Chevron Phillips Chemical Makes FID for Propylene Expansion in Baytown - Houston Business Journal. *Houston Business Journal*. December 15, 2021. <https://www.bizjournals.com/houston/news/2021/12/15/chevron-phillips-chemical-propylene-baytown-fid.html> (accessed 2023-08-28).
- (9) Hays, K.; Hogan, M. *FACTBOX: Southeast Texas chemical facilities closer to restart; Louisiana facing longer outages*. <https://www.spglobal.com/commodityinsights/en/market-insights/latest-news/petrochemicals/090220-factbox-southeast-texas-chemical-facilities-closer-to-restart-louisiana-facing-longer-outages> (accessed 2023-08-28).
- (10) Baumgarten, S. *CP Chem to build propylene unit at Baytown, Texas*. ICIS Explore. <https://www.icis.com/explore/resources/news/2021/12/15/10716341/cp-chem-to-build-propylene-unit-at-baytown-texas> (accessed 2023-08-28).
- (11) Balboa, B. *CPChem reports Sweeny ethylene unit process upset in Texas*. <https://www.spglobal.com/commodityinsights/en/market-insights/latest-news/petrochemicals/032119-cpchem-reports-sweeny-ethylene-unit-process-upset-in-texas> (accessed 2023-08-28).
- (12) United States Securities and Exchange Commission. *Form 10-K: Chevron Phillips Chemical Company LLC*; 333-59054–01; Washington, D.C., 2003.

- [https://www.sec.gov/Archives/edgar/data/1127399/000110465903004008/j8027\\_10k.pdf](https://www.sec.gov/Archives/edgar/data/1127399/000110465903004008/j8027_10k.pdf) (accessed 2022-10-22).
- (13) Offshore Technology. *Petrochemicals complex profile: Dow Freeport Complex, the US*. <https://www.offshore-technology.com/data-insights/dow-freeport-complex-united-states/> (accessed 2023-08-28).
  - (14) Greenwood, A. *INEOS declares FM on US ethanolamines on EO disruption in Louisiana*. ICIS Explore. <https://www.icis.com/explore/resources/news/2019/11/06/10440749/ineos-declares-fm-on-us-ethanolamines-on-eo-disruption-in-louisiana> (accessed 2023-08-28).
  - (15) Jones, A. Dow to Restart One Louisiana Plant next Week | Argus Media. *Argus Media*. September 2, 2021. <https://www.argusmedia.com/en/news/2250316-dow-to-restart-one-louisiana-plant-next-week> (accessed 2023-08-28).
  - (16) Agency for Toxic Substances and Disease Registry. Toxicology Profile of Ethylene Glycol. In *Toxicology Profile of Ethylene Glycol*; U.S. Department of Health and Human Services: Atlanta, GA, 1993; pp 179–186.
  - (17) Hays, K.; Gallegos, E.; Torres, A. *FACTBOX: Three-fourths of US ethylene capacity offline from deep freeze: Westlake CEO*. <https://www.spglobal.com/commodityinsights/en/market-insights/latest-news/petrochemicals/022321-factbox-three-fourths-of-us-ethylene-capacity-offline-from-deep-freeze-westlake-ceo> (accessed 2023-08-28).
  - (18) Wood, C. *Eastman extends Longview steam cracker outage on ethylene economics: sources*. <https://www.spglobal.com/commodityinsights/en/market-insights/latest-news/petrochemicals/071918-eastman-extends-longview-steam-cracker-outage-on-ethylene-economics-sources> (accessed 2023-08-28).
  - (19) Mirasol, F. *US chemical profile: ethylene oxide*. ICIS Explore. <https://www.icis.com/explore/resources/news/2010/08/01/9380662/us-chemical-profile-ethylene-oxide> (accessed 2023-08-28).
  - (20) Burleson, E. Exxon Mobil and SABIC's Giant South Texas Petrochemical Plant Starts up - Houston Business Journal. *Houston Business Journal*. January 20, 2022. <https://www.bizjournals.com/houston/news/2022/01/20/exxon-sabic-ethylene-gulf-coast.html> (accessed 2023-08-28).
  - (21) de Luna. Exxon and SABIC's Chemical Plant near Corpus Christi to Launch by Year End. *Houston Chronicle*. July 30, 2021. <https://www.houstonchronicle.com/business/article/Exxon-and-SABIC-s-chemical-plant-near-Corpus-16353713.php> (accessed 2023-08-28).
  - (22) Offshore Technology. *Petrochemicals complex profile: Exxon Mobil Corporation Baton Rouge Complex, the US*. Offshore Technology. <https://www.offshore-technology.com/marketdata/exxon-mobil-corporation-baton-rouge-complex-united-states/> (accessed 2023-08-28).
  - (23) Kelley, L. *Fire out at ExxonMobil's US Baytown olefins plant; unit at reduced rates*. ICIS Explore. <https://www.icis.com/explore/resources/news/2019/08/01/10399526/fire-out-at-exxonmobil-s-us-baytown-olefins-plant-unit-at-reduced-rates> (accessed 2023-08-28).
  - (24) Offshore Technology. *Petrochemicals complex profile: Exxon Mobil Corporation Beaumont Complex, US*. Offshore Technology. <https://www.offshore-technology.com/data-insights/exxon-mobil-corporation-beaumont-complex-united-states/> (accessed 2023-08-28).
  - (25) Mr. Chub. *Motiva Chemicals restarts its cracker in Port Arthur*. <https://www.mrchub.com/news/384650-motiva-chemicals-restarts-its-cracker-in-port-arthur> (accessed 2023-08-28).

- (26) Offshore Technology. *Petrochemicals complex profile: Formosa Plastics Group Point Comfort Complex, US*. Offshore Technology. <https://www.offshore-technology.com/data-insights/formosa-plastics-group-point-comfort-complex-united-states/> (accessed 2023-08-28).
- (27) Louisiana Economic Development. *Indorama Ventures Announces \$175 Million Ethane Cracker Project Near Lake Charles | Louisiana Economic Development. Opportunity Louisiana*. September 23, 2015. [https://www.opportunitylouisiana.gov/led-news/news-releases/news/2015/09/23/indorama-ventures-announces-\\$175-million-ethane-cracker-project-near-lake-charles](https://www.opportunitylouisiana.gov/led-news/news-releases/news/2015/09/23/indorama-ventures-announces-$175-million-ethane-cracker-project-near-lake-charles) (accessed 2023-08-28).
- (28) Indorama Ventures. *Indorama Ventures Oxides | Indorama Ventures*. Indorama Ventures. <https://www.indoramaventures.com/en/worldwide/1508/indorama-ventures-oxides> (accessed 2023-08-28).
- (29) Offshore Technology. *Petrochemicals complex profile: INEOS Chocolate Bayou Complex, US*. Offshore Technology. <https://www.offshore-technology.com/marketdata/ineos-chocolate-bayou-complex-united-states/> (accessed 2023-08-28).
- (30) Offshore Technology. *LyondellBasell Channelview Complex, 2022-2030*. Offshore Technology. <https://www.offshore-technology.com/marketdata/lyondellbasell-channelview-complex-united-states/> (accessed 2023-08-28).
- (31) Greenwood, A. *LyondellBasell pushes US PO/TBA project start-up to Q1 2023*. ICIS Explore. <https://www.icis.com/explore/resources/news/2022/07/29/10790332/lyondellbasell-pushes-us-po-tba-project-start-up-to-q1-2023> (accessed 2023-08-28).
- (32) Deligio, T. *LyondellBasell to shutter Chocolate Bayou olefins plant*. plasticstoday.com. <https://www.plasticstoday.com/lyondellbasell-shutter-chocolate-bayou-olefins-plant> (accessed 2023-08-28).
- (33) LyondellBasell. *LyondellBasell Clinton Complex Celebrates 50 Years of Operation*. LyondellBasell. <https://www.lyondellbasell.com/en/news-events/corporate--financial-news/lyondellbasell-clinton-complex-celebrates-50-years-of-operation/> (accessed 2023-08-28).
- (34) Greenwood, A. *LyondellBasell eyes H1 shutdown for Corpus Christi*. ICIS Explore. <https://www.icis.com/explore/resources/news/2015/10/23/9936353/lyondellbasell-eyes-h1-shutdown-for-corpus-christi> (accessed 2023-08-28).
- (35) Offshore Technology. *Petrochemicals complex profile: LyondellBasell La Porte Complex, US*. Offshore Technology. <https://www.offshore-technology.com/data-insights/lyondellbasell-la-porte-complex-united-states/> (accessed 2023-08-28).
- (36) THE NAVIGATIIR. *U.S. Chemical Producers Plan for 400 Turnarounds in Second Quarter*. <https://www.industrialinfo.com/navigatiir/?date=2023/03/&pagerequest=02> (accessed 2023-08-28).
- (37) NOVA Chemicals. *Geismar, LA, USA*. NOVA Chemicals. <https://www.novachem.com/locations/geismar-la-usa/> (accessed 2023-08-28).
- (38) Bailey, M. *Ingleside Ethylene starts up ethylene cracker in Texas*. Chemical Engineering. <https://www.chemengonline.com/ingleside-ethylene-starts-up-ethylene-cracker-in-texas/> (accessed 2023-08-28).
- (39) Sasol. *Outcome of the Lake Charles Chemicals Project review | Sasol*. <https://www.sasol.com/outcome-lake-charles-chemicals-project-review> (accessed 2023-08-28).



- (40) Inspectioneering. *Sasol Starts Up New Ethylene Oxide Unit at Lake Charles Facility*. <https://inspectioneering.com/news/2019-06-03/8503/sasol-brings-ethylene-oxide-unit-online-at-its-lake-charles-chem> (accessed 2023-08-28).
- (41) Offshore Technology. *Petrochemicals complex profile: Sasol Lake Charles Complex, the US*. Offshore Technology. <https://www.offshore-technology.com/marketdata/sasol-lake-charles-complex-united-states/> (accessed 2023-08-28).
- (42) Offshore Technology. *Petrochemicals complex profile: Shell Chemicals Deer Park Complex, US*. Offshore Technology. <https://www.offshore-technology.com/marketdata/shell-chemicals-deer-park-complex-united-states/> (accessed 2023-08-28).
- (43) Shell plc. *Norco Fact Sheet*. <https://www.shell.us/about-us/projects-and-locations/norco-manufacturing-complex/shell-norco-manufacturing-complex.html> (accessed 2023-08-28).
- (44) ShinEtsu. *Shintech Announces Plans for the Construction of Ethylene Plant in Louisiana*. Shin-Etsu Chemical Co., Ltd. <https://www.shinetsu.co.jp/en/news/news-release/shintech-announces-plans-for-the-construction-of-ethylene-plant-in-louisiana/> (accessed 2023-08-28).
- (45) Westlake Chemical Partners LP. *Westlake Chemical Partners LP 2nd Quarter 2018*; 2018. [https://s25.q4cdn.com/892202310/files/doc\\_presentations/2018/10/Deutsche-Bank-MLP-NDRS.pdf](https://s25.q4cdn.com/892202310/files/doc_presentations/2018/10/Deutsche-Bank-MLP-NDRS.pdf) (accessed 2022-10-24).
- (46) Mr. Chub. *Blast occurred at Westlake Chemical site in Sulphur*. Mr. Chub. <https://www.mrchub.com/news/393746-blast-occured-at-westlake-chemical-site-in-sulphur> (accessed 2023-08-28).
- (47) Stratas Advisors. *Downstream North America Upcoming Cracker Projects and Capacity Outlook*. Stratas Advisors. <https://stratasadvisors.com/Insights/2019/041119-Downstream-North-America-Upcoming-Cracker-Projects-and-Capacity-Outlook> (accessed 2022-10-23).
- (48) Brelsford, R. *Ethylene complex delay reinforces need to address social, environmental justice*. Oil & Gas Journal. <https://www.ogj.com/refining-processing/article/14208266/ethylene-complex-delay-reinforces-need-to-address-social-environmental-justice> (accessed 2023-08-29).
- (49) Hays, K. *Indorama's Texas monoethylene glycol plant returns to full rates: source*. S&P Global Commodity Insights. <https://www.spglobal.com/commodityinsights/en/market-insights/latest-news/petrochemicals/100419-indoramas-texas-monoethylene-glycol-plant-returns-to-full-rates-source> (accessed 2023-08-29).
- (50) Indorama Ventures. *Indorama Ventures Oxides International | Indorama Ventures*. <https://www.indoramaventures.com/en/worldwide/1509/indorama-ventures-oxides-international> (accessed 2023-08-29).
- (51) Indorama Ventures. *Indorama Ventures Propylene Oxides | Indorama Ventures*. Indorama Ventures. <https://www.indoramaventures.com/en/worldwide/1510/indorama-ventures-propylene-oxides> (accessed 2023-08-29).
- (52) The Urethane Blog. *BASF Starts Turnaround at Geismar*. The Urethane Blog. [https://urethaneblog.typepad.com/my\\_weblog/2012/02/basf-starts-turnaround-at-geismar.html](https://urethaneblog.typepad.com/my_weblog/2012/02/basf-starts-turnaround-at-geismar.html) (accessed 2023-08-29).
- (53) Reuters Events Downstream. *Multimedia: Mapping North America's petrochemical construction projects | Reuters Events | Downstream*. Reuters Events. <https://www.reutersevents.com/downstream/engineering-and-construction/multimedia-mapping-north-americas-petrochemical-construction-projects> (accessed 2023-08-29).

- (54) Mitchell, D. J. No Injuries, Exposures in Leak of Explosive, Toxic Chemical at Shell Geismar Complex, Company Says | Ascension | Theadvocate.Com. *The Advocate*. January 24, 2020.  
[https://www.theadvocate.com/baton\\_rouge/news/communities/ascension/article\\_a7713980-3ed5-11ea-ba62-5f3abe0e1ad0.html](https://www.theadvocate.com/baton_rouge/news/communities/ascension/article_a7713980-3ed5-11ea-ba62-5f3abe0e1ad0.html) (accessed 2023-08-29).
- (55) Powder Bulk Solids. *Firm Starts Up Ethylene Glycol Plant in U.S. Gulf Coast*. powderbulksolids.com. <https://www.powderbulksolids.com/wire-cloth/firm-starts-ethylene-glycol-plant-us-gulf-coast> (accessed 2023-08-29).
- (56) LOTTE Chemical. *[Press Release] LOTTE Chemical Establishes Itself as a Hub of Shale Gas in the U.S.* <https://www.lottechem.com/WEB-INF/jsp/en/media/news/view.jsp> (accessed 2023-08-29).
- (57) Mirasol, F. *US chemical profile: Propylene oxide*. ICIS Explore. <https://www.icis.com/explore/resources/news/2011/03/27/9447303/us-chemical-profile-propylene-oxide> (accessed 2023-08-29).
- (58) ICIS. *ICIS Chemical Business: Making Sense of Chemical Prices 2017-2018 Chemical Profile Special*; ICIS, 2018. chrome-extension://efaidnbmnnnibpcajpcglclefindmkaj/[https://s3-eu-west-1.amazonaws.com/cjprbi-icis/wp-content/uploads/sites/7/2018/10/03215936/icis\\_2018\\_08-chemical-profiles.pdf](https://s3-eu-west-1.amazonaws.com/cjprbi-icis/wp-content/uploads/sites/7/2018/10/03215936/icis_2018_08-chemical-profiles.pdf).
- (59) Argus Media. *Argus Propylene and Derivatives*; Issue 21-25; 2021. <https://www.argusmedia.com/-/media/Files/sample-reports/argus-propylene-and-derivatives-20210901.ashx?la=ru&hash=1A1A5EF22BE295606D016F9B59E2669D7E74E7A2>.
- (60) Chang, J. *Formosa Plastics delays US PDH project to 2020-21*. Hydrocarbon Processing Construction Boxscore Database. <https://www.constructionboxscore.com/project-news/formosa-plastics-delays-us-pdh-project-to-2020-21.aspx> (accessed 2023-08-28).
- (61) Mr. Chub. *Delek releases statement regarding weekend refinery fire in El Dorado*. Mr. Chub. <https://www.mrchub.com/news/384460-delek-releases-statement-regarding-weekend-refinery-fire-in-el-dorado> (accessed 2023-08-29).
- (62) ECHEMI. *INVISTA Acquires FHR Propylene Business - ECHEMI.com*. ECHEMI. <https://www.echemi.com/cms/465185.html> (accessed 2023-08-29).
- (63) IHS Markit. *North American Propylene Market Six Key Trends to Watch*; 2017. <https://cdn.ihs.com/www/pdf/NAPS-6Trends.pdf>.
- (64) Richessen, B. *Enterprise enters into long-term agreement for PDH 2 facility - LP Gas*. LP Gas - Serving the retail and wholesale companies that market propane in the US. <https://www.lpgasmagazine.com/enterprise-enters-into-long-term-agreement-for-pdh-2-facility/> (accessed 2023-08-29).
- (65) PetroLogistics. *500 KTA Gulf Coast PDH Project Using Dow FCDh Technology – PetroLogistics*. <https://petrologistics.com/projects/500-kta-gulf-coast-pdh-project-using-dow-fcdh-technology/> (accessed 2023-08-29).
- (66) LyondellBasell. *LyondellBasell to Build the World's Largest PO/TBA Plant in Texas | LyondellBasell*. <https://www.lyondellbasell.com/en/bayport-choate-plant/news/lyondellbasell-to-build-the-worlds-largest-po-tba-plant-in-texas/> (accessed 2023-08-29).
- (67) Desantis, D.; James, B.; Saur, G. *Future (2040) Hydrogen Production from Distributed Grid PEM Electrolysis*, 2022. www.nrel.gov.
- (68) Perzon, H. *A Simulation Model of a Reactor for Ethylene Oxide Production*. **2015**.

- (69) Air Liquide. *Hydrogen Membrane Overview: Advanced Membrane Technology for Hydrogen Purification and Recovery*; 2022.
- (70) Hays, K. *US ethylene exports down as producers focus on restocking: Navigator CEO | S&P Global Commodity Insights*. S&P Global Commodity Insights. <https://www.spglobal.com/commodityinsights/en/market-insights/latest-news/petrochemicals/081721-us-ethylene-exports-down-as-producers-focus-on-restocking-navigator-ceo> (accessed 2023-07-16).
- (71) U.S. DOE. *Water and Wastewater Annual Price Escalation Rates for Selected Cities across the United States*; Office of Energy Efficiency, 2017.
- (72) ChemAnalyst. *Ethylene Oxide Price Trend and Forecast*. ChemAnalyst. <https://www.chemanalyst.com/Pricing-data/ethylene-oxide-1102#:~:text=FOB-US%20Ethylene%20Oxide%20prices,higher%20demand%20in%20the%20region.> (accessed 2023-07-16).
- (73) IEA. *IEA Global Hydrogen Review 2021*; Paris, 2021. <https://www.iea.org/reports/global-hydrogen-review-2021>.
- (74) ChemAnalyst. *Mono Ethylene Glycol (MEG) Price Trend and Forecast*. ChemAnalyst. <https://www.chemanalyst.com/Pricing-data/mono-ethylene-glycol-4> (accessed 2023-07-16).
- (75) Vitasari, C. R.; Meindersma, G. W.; de Haan, A. B. Conceptual Process Design of an Integrated Bio-Based Acetic Acid, Glycolaldehyde, and Acetol Production in a Pyrolysis Oil-Based Biorefinery. *Chem. Eng. Res. Des.* **2015**, *95*, 133–143. <https://doi.org/10.1016/j.cherd.2015.01.010>.
- (76) ChemAnalyst. *Acetaldehyde Price Trend and Forecast*. <https://www.chemanalyst.com/Pricing-data/acetaldehyde-1124> (accessed 2023-08-14).
- (77) ChemAnalyst. *Formic Acid Price Trend and Forecast*. ChemAnalyst. <https://www.chemanalyst.com/Pricing-data/formic-acid-1242> (accessed 2023-08-24).
- (78) World Population Review. *Corporate Tax Rates by State [Updated July 2023]*. <https://worldpopulationreview.com/state-rankings/corporate-tax-rates-by-state> (accessed 2023-08-29).
- (79) ChemAnalyst. *Propylene Price Trend and Forecast*. ChemAnalyst. <https://www.chemanalyst.com/Pricing-data/propylene-51> (accessed 2023-07-16).
- (80) ChemAnalyst. *Propylene Oxide Price Trend and Forecast*. ChemAnalyst. <https://www.chemanalyst.com/Pricing-data/propylene-oxide-58> (accessed 2023-07-16).
- (81) ChemAnalyst. *Propylene Glycol Price Trend and Forecast*. ChemAnalyst. <https://www.chemanalyst.com/Pricing-data/propylene-glycol-1095> (accessed 2023-07-16).
- (82) ChemAnalyst. *Acetone Price Trend and Forecast*. ChemAnalyst. <https://www.chemanalyst.com/Pricing-data/acetone-12> (accessed 2023-08-14).
- (83) ChemAnalyst. *Acetic Acid Price Trend and Forecast*. <https://www.chemanalyst.com/Pricing-data/acetic-acid-9> (accessed 2023-08-14).
- (84) Liu, L.; Ye, X. P.; Bozell, J. J. A Comparative Review of Petroleum-Based and Bio-Based Acrolein Production. *ChemSusChem* **2012**, *5* (7), 1162–1180. <https://doi.org/10.1002/cssc.201100447>.
- (85) National Institute of Chemistry. *Sustainable production of allyl alcohol*. For Industry. <https://www.ki.si/en/for-industry/licensing-opportunities/environment-and-green-technologies/sustainable-production-of-allyl-alcohol/> (accessed 2023-08-15).

- (86) Johnson, D. T.; Taconi, K. A. The Glycerin Glut: Options for the Value-Added Conversion of Crude Glycerol Resulting from Biodiesel Production. *Environ. Prog.* **2007**, *26* (4), 338–348. <https://doi.org/10.1002/ep.10225>.
